# Supplementary material for: Heterocycles for direct air capture and MOFs prepared from CO2 utilization
Source: Royal Society of Chemistry journal article supplement (doi:10.1039/d3ta07024g), 2024-01-01
Supplement: d3ta07024g1.pdf [file d3ta07024g1.pdf]

1

## Supporting information

2

# Heterocycles for direct air capture and MOFs

3

## prepared from CO<sub>2</sub> utilization

4

Jingcheng Du,<sup>1</sup> Linghao Liu,<sup>1</sup> Qian Sun,<sup>1</sup> Ziyi Song,<sup>1</sup> Ayan Yao,<sup>1</sup> Ji Ma,<sup>1</sup> Tai-Shung

5

Chung,<sup>2,3</sup> \* Wei Xu,<sup>4</sup> Hongjun Zhang,<sup>4</sup> Jiangtao Liu<sup>1, \*</sup>

6

7

8

9 <sup>1</sup>Department of Environmental Science and Engineering, University of Science and

10 Technology of China, Hefei, China, 230052

11 <sup>2</sup>Department of Chemical and Biomolecular Engineering, National University of

12 Singapore, 117576, Singapore

13 <sup>3</sup>Graduate Institute of Applied Science and Technology, National Taiwan University

14 of Science and Technology, Taipei, Taiwan, 10607

15 <sup>4</sup>State Key Laboratory of Particle Detection and Electronics, University of Science

16 and Technology of China, Hefei, China, 230052

17

## 18 1. Experimental

### 19 1.1 Materials

20 All chemicals and solvents used in the syntheses were of reagent grade and used without

21 any further purification. Zinc nitrate hexahydrate (Zn(NO<sub>3</sub>)<sub>2</sub>·6H<sub>2</sub>O, 99%) was of

22 analytical grade and ordered from Shanghai Aladdin Biochemical Technology Co., Ltd.

23 (Shanghai, China). Zinc acetate dihydrate ( $C_4H_6O_4Zn \cdot 2H_2O$ , 99%), zinc sulfate  
24 heptahydrate ( $ZnSO_4 \cdot 7H_2O$ , 99.5%), N, N-dimethylformamide ( $C_3H_7NO$ , 99.5%),  
25 acetonitrile ( $C_2H_3N$ , 99.5%), isopropanol ( $C_3H_8O$ , 99.7%), dichloromethane ( $CH_2Cl_2$ ,  
26 99.5%), potassium carbonate ( $K_2CO_3$ , 99.0%), hydrochloric acid (HCl, 36.0-38.0%),  
27 and toluene ( $C_7H_8$ , 99.5%) were of analytical grade and purchased from Sinopharm  
28 Chemical Reagent Co., Ltd. (Shanghai, China). Piperazine ( $C_4H_{10}N_2$ , 97%) and  
29 1,4,8,11-tetraazacyclotetradecane ( $C_{10}H_{24}N_4$ , 98%) were obtained from Shanghai  
30 Tensus Biotech Co., Ltd. (Shanghai, China). 1,4,7-Triazacyclononane ( $C_6H_{15}N_3$ , 98%)  
31 was received from Shanghai Macklin Biochemical Co., Ltd. (Shanghai, China). High  
32 purity  $H_2$  ( $\geq 99.999\%$ )  $CO_2$  ( $\geq 99.999\%$ ),  $N_2$  ( $\geq 99.999\%$ ) and  $CH_4$  ( $\geq 99.999\%$ ) were  
33 purchased from Nanjing Shangyuan Industrial Gas Factory. Air source was acquired  
34 from Nanjing Special Gas Co. Ltd. 5,5',6,6'-Tetrahydroxy-3,3,3',3'-tetramethyl-1,1'-  
35 spirobisindane (TTSBI, 97%, Alfa Aesar), 2,3,5,6-Tetrafluoroterephthalonitrile  
36 (TFTPN, 99%, Sigma-Aldrich) was purified via sublimation.

## 37 1.2 DAC experiments

38 First, 10 mL MeCN and 1 mmol  $HC_4-N_2$  were placed in a round-bottom flask and  
39 homogenized by a magnetic stirrer at 200 r/min. Then, the round-bottomed flask was  
40 loaded into the DAC testing system. The nondispersive infrared  $CO_2$  meter, for  
41 detecting  $CO_2$  concentration in the downstream of the reactor, was turned on. The air  
42 source was turned on, and the flow rate was adjusted to  $60 \text{ mL min}^{-1}$  for the DAC  
43 experiments.

## 44 1.3 Fabrication of $HC_x-N_y-CO_2-Zn$ MOFs

### 45 **1.3.1 Synthesis of HC<sub>4</sub>-N<sub>2</sub>-CO<sub>2</sub>**

46 The synthesis strategy of HC<sub>x</sub>-N<sub>y</sub>-CO<sub>2</sub> powders was carried out with slight  
47 modifications based on the previous literature <sup>S1</sup>. The specific preparation method was  
48 as follows: 0.75 mmol (51.68 mg) piperazine (HC<sub>4</sub>-N<sub>2</sub>) was dissolved in 20 mL IPA  
49 and ultrasonicated for 10 minutes in a 50 mL round-bottom flask filled with an agitator  
50 and rubber stopper. A clear and transparent colorless solution was obtained. N<sub>2</sub> was  
51 added and swept for 10 minutes to remove air in the aqueous solvent and round-bottom  
52 flask. Rapidly, CO<sub>2</sub> was introduced into the bottom of the round-bottom flask using a  
53 catheter at room temperature and pressure, accompanied by bubbles in the solvent. In  
54 this process, continuous magnetic stirring (960 r/min) made the distribution of starting  
55 materials and CO<sub>2</sub> more uniform. After 1 minute, a white precipitate was produced. As  
56 the reaction proceed, more CO<sub>2</sub> reacted with the secondary amine groups of HC<sub>4</sub>-N<sub>2</sub>,  
57 resulting in an increasing number of products until the reaction was completed after 3  
58 hours. The white precipitate was centrifugally washed with isopropanol 3 times and  
59 dried in a vacuum drying oven at 25 °C for 10 h. Finally, a white powder was obtained  
60 by grinding.

### 61 **1.3.2 Synthesis of HC<sub>6</sub>-N<sub>3</sub>-CO<sub>2</sub>**

62 The HC<sub>6</sub>-N<sub>3</sub>-CO<sub>2</sub> powder synthesis strategy was similar to that of HC<sub>4</sub>-N<sub>2</sub>-CO<sub>2</sub> with  
63 slight modifications. The specific preparation method was as follows: First, 0.75 mmol  
64 96.91 mg 1,4,7-triazacyclononane (HC<sub>6</sub>-N<sub>3</sub>) was dissolved in 20 mL MeCN organic  
65 solvent. As reported in the previous literature <sup>S2</sup>, MeCN is more conducive to the  
66 dissolution of CO<sub>2</sub> due to the presence of nitrogenous groups with a strong affinity for

67 CO<sub>2</sub> and is more conducive to realizing a high yield. A clear and transparent colorless  
68 solution was obtained in a 50 mL round-bottom flask with a rubber stopper and agitator  
69 for 10 min by ultrasound. Thereafter, N<sub>2</sub> was injected for 10 minutes to remove air from  
70 the solvent and round-bottomed flask. Promptly, CO<sub>2</sub> was introduced into the bottom  
71 of the round-bottomed flask using a catheter at room temperature and pressure,  
72 accompanied by bubbles in the solvent. During this process, magnetic stirring (960  
73 r/min) was carried out continuously to make the distribution of starting materials and  
74 CO<sub>2</sub> more uniform. A white precipitate was generated after 5 s, indicating that the  
75 reactive activation of HC<sub>6</sub>-N<sub>3</sub> was higher than that of HC<sub>4</sub>-N<sub>2</sub> due to the special  
76 chemical structure. As the reaction progressed, more CO<sub>2</sub> reacted with the secondary  
77 amine group of HC<sub>6</sub>-N<sub>3</sub>, resulting in an increasing number of products until the reaction  
78 ended 2 hours later. The white precipitate was washed 3 times by centrifugation with  
79 the MeCN solvent and dried in a vacuum drying oven for 10 hours. After grinding,  
80 white powders were also obtained.

### 81 **1.3.3 Synthesis of HC<sub>10</sub>-N<sub>4</sub>-CO<sub>2</sub>**

82 The synthesis strategy of HC<sub>10</sub>-N<sub>4</sub>-CO<sub>2</sub> powders was similar to that of HC<sub>4</sub>-N<sub>2</sub>-CO<sub>2</sub>  
83 with only slight modifications. The specific preparation method was as follows: First,  
84 1.50 mmol 300.50 mg needle-like 1,4,8,11-tetraazacyclotetradecane (HC<sub>10</sub>-N<sub>4</sub>) as the  
85 starting material was dissolved in a 30 mL MeCN organic solvent of 30 mL. A clear  
86 and transparent colorless solution was obtained in a 50 mL round-bottom flask with a  
87 rubber stopper and agitator for 10 min by ultrasound. Similarly, N<sub>2</sub> was injected for 10  
88 minutes to remove air from the solvent and round-bottomed flask. Rapidly, CO<sub>2</sub> was

89 introduced into the bottom of the round-bottomed flask using a catheter at room  
90 temperature and pressure, accompanied by bubbles in the solvent. During this process,  
91 magnetic stirring (960 r/min) was carried out continuously to make the distribution of  
92 starting materials and CO<sub>2</sub> more uniform. After 30 min, a white precipitate was  
93 produced, indicating that the reactive activation of HC<sub>10</sub>-N<sub>4</sub> was lower than that of HC<sub>4</sub>-  
94 N<sub>2</sub> and HC<sub>6</sub>-N<sub>3</sub> due to the more complex chemical structure. As the reaction progressed,  
95 more CO<sub>2</sub> reacted with the secondary amine groups of HC<sub>10</sub>-N<sub>4</sub>, resulting in an  
96 increasing number of products until the reaction ended after 5 hours. The white  
97 precipitate was washed 3 times by centrifugation with MeCN and dried in a vacuum  
98 drying oven for 10 h. After grinding, white powders were also obtained.

#### 99 **1.3.4 Synthesis of HC<sub>4</sub>-N<sub>2</sub>-CO<sub>2</sub>-ZnX (X=OAC<sup>-</sup>, NO<sub>3</sub><sup>-</sup>, SO<sub>4</sub><sup>2-</sup>)**

100 The synthesis strategy of HC<sub>4</sub>-N<sub>2</sub>-CO<sub>2</sub>-ZnX powders was carried out as follows:  
101 Initially, 0.8 mmol 175.6 mg Zn(OAC)<sub>2</sub>·2H<sub>2</sub>O [0.8 mmol 237.99 mg Zn(NO<sub>3</sub>)<sub>2</sub>·6H<sub>2</sub>O  
102 or 0.8 mmol 230.05 mg ZnSO<sub>4</sub>·7H<sub>2</sub>O] and 0.75 mmol (51.68 mg) HC<sub>4</sub>-N<sub>2</sub> were  
103 dissolved in 20 mL N,N-dimethylformamide (DMF) and 20 mL IPA solvent,  
104 respectively. The clear and transparent colorless solution was obtained by ultrasound  
105 for 10 min. N<sub>2</sub> bubbling was carried out and purged for 10 min to remove the air in the  
106 metal solution and round-bottom flask. Zn(OAC)<sub>2</sub>·2H<sub>2</sub>O, Zn(NO<sub>3</sub>)<sub>2</sub>·6H<sub>2</sub>O or  
107 ZnSO<sub>4</sub>·7H<sub>2</sub>O and HC<sub>4</sub>-N<sub>2</sub> solution were placed in a 100 mL round-bottom flask filled  
108 with an agitator and rubber stopper. Promptly, CO<sub>2</sub> was introduced into the bottom of  
109 the round-bottom flask using a catheter at room temperature and pressure, accompanied  
110 by bubbles in the solvent. During this process, magnetic stirring (960 r/min) was carried

111 out continuously to make the distribution of starting materials and CO<sub>2</sub> more uniform.  
112 After 10 s, a white precipitate occurred. As the reaction proceeded, CO<sub>2</sub> reacted with  
113 the secondary amine groups of HC<sub>4</sub>-N<sub>2</sub> to form HC<sub>4</sub>-N<sub>2</sub>-CO<sub>2</sub>, which acted as the ligands  
114 of the MOFs. Ultimately, the resulting ligands reacted with six-coordinated zinc  
115 clusters to form Zn-MOFs. As the reaction progressed, an increasing number of white  
116 products were produced until the reaction was over three hours later. The final white  
117 precipitates, HC<sub>4</sub>-N<sub>2</sub>-CO<sub>2</sub>-Zn(OAC)<sub>2</sub>, HC<sub>4</sub>-N<sub>2</sub>-CO<sub>2</sub>-Zn(NO<sub>3</sub>)<sub>2</sub>, and HC<sub>4</sub>-N<sub>2</sub>-CO<sub>2</sub>-  
118 ZnSO<sub>4</sub>, were centrifugally washed with DMF and IPA 3 times and dried in a vacuum  
119 oven for 10 hours. The white powders were ground, sealed and preserved under  
120 vacuum.

### 121 **1.3.5 Synthesis of HC<sub>6</sub>-N<sub>3</sub>-CO<sub>2</sub>-ZnY (Y=OAC<sup>-</sup>, NO<sub>3</sub><sup>-</sup>)**

122 The synthesis strategy of HC<sub>6</sub>-N<sub>3</sub>-CO<sub>2</sub>-ZnY powders was similar to that of HC<sub>4</sub>-N<sub>2</sub>-  
123 CO<sub>2</sub>-ZnX. The specific method was carried out as follows: First, 0.9 mmol 197.56 mg  
124 Zn(OAC)<sub>2</sub>·2H<sub>2</sub>O [0.9 mmol 267.74 mg Zn(NO<sub>3</sub>)<sub>2</sub>·6H<sub>2</sub>O] and 0.75 mmol 96.91 mg  
125 HC<sub>6</sub>-N<sub>3</sub> were dissolved in 20 mL DMF and 20 mL MeCN, respectively. Thereafter, the  
126 solutions were fully dissolved by ultrasound for 10 min to obtain clear and transparent  
127 colorless solutions. A N<sub>2</sub> bubble was added and purged for 10 minutes to remove the  
128 air in the solvent. The Zn(OAC)<sub>2</sub>·2H<sub>2</sub>O [Zn(NO<sub>3</sub>)<sub>2</sub>·6H<sub>2</sub>O] and HC<sub>6</sub>-N<sub>3</sub> solutions were  
129 placed in a 100 mL round-bottom flask with a rubber stopper filled with an agitator.  
130 Rapidly, CO<sub>2</sub> was introduced into the bottom of the round-bottom flask using a catheter  
131 at room temperature and pressure, accompanied by bubbles in the solvent and round-  
132 bottomed flask. A white precipitate was formed immediately with the entry of CO<sub>2</sub>.

133 During this process, magnetic stirring (960 r/min) was carried out continuously to make  
134 the distribution of starting materials and the CO<sub>2</sub> system more uniform. In this reaction  
135 system, CO<sub>2</sub> reacted with the secondary amine groups of HC<sub>6</sub>-N<sub>3</sub> to form HC<sub>6</sub>-N<sub>3</sub>-CO<sub>2</sub>  
136 as the ligands of MOFs. Furthermore, the resulting ligands reacted with six-coordinated  
137 zinc clusters to form Zn-MOFs. As the reaction progressed, an increasing number of  
138 white products was produced until the reaction was conducted over 2 hours. The white  
139 precipitate was centrifugally washed with DMF and MeCN 3 times and dried in a  
140 vacuum oven for 10 h. Fine HC<sub>6</sub>-N<sub>3</sub>-CO<sub>2</sub>-Zn(OAC)<sub>2</sub> and HC<sub>6</sub>-N<sub>3</sub>-CO<sub>2</sub>-ZnNO<sub>3</sub> white  
141 powders were obtained by grinding, which were sealed and stored in vacuum for later  
142 use.

### 143 **1.3.6 Synthesis of HC<sub>10</sub>-N<sub>4</sub>-CO<sub>2</sub>-Zn(OAC)<sub>2</sub>**

144 The synthesis strategy of HC<sub>10</sub>-N<sub>4</sub>-CO<sub>2</sub>-Zn(OAC)<sub>2</sub> powders was as follows: 1.5 mmol  
145 329.27 mg Zn(OAC)<sub>2</sub>·2H<sub>2</sub>O and a certain amount of HC<sub>10</sub>-N<sub>4</sub>-CO<sub>2</sub> powder were  
146 dissolved in 20 mL DMF and 20 mL IPA, respectively. Two clear and transparent  
147 colorless solutions were obtained by ultrasound for 10 min. N<sub>2</sub> was added and purged  
148 for 10 min to remove the air in the solvents and round-bottomed flask. The  
149 Zn(OAC)<sub>2</sub>·2H<sub>2</sub>O and HC<sub>10</sub>-N<sub>4</sub>-CO<sub>2</sub> solutions were placed in a 100 mL round-bottom  
150 flask with a rubber stopper filled with an agitator. Rapidly, CO<sub>2</sub> was introduced into the  
151 bottom of the round-bottom flask using a catheter at room temperature and pressure,  
152 accompanied by bubbles in the solvent. During this process, magnetic stirring (960  
153 r/min) was carried out continuously to make the distribution of starting materials and  
154 CO<sub>2</sub> more uniform. In the process, HC<sub>10</sub>-N<sub>4</sub>-CO<sub>2</sub>, as the ligand, reacted with six-

155 coordinated zinc clusters to form Zn-MOFs. After 6 hours of reaction, the liquid was  
156 heated to 80 °C to precipitate the crystal powders. The white  $\text{HC}_{10}\text{-N}_4\text{-CO}_2\text{-Zn(OAC)}_2$   
157 powders obtained by grinding were sealed and stored in vacuum for later use.

158

## 159 **1.4 Fabrication of PIM-1-based mixed-matrix membranes**

### 160 **1.4.1 TTSBI and TFTPn purification**

161 5,5',6,6'-Tetrahydroxy-3,3,3',3'-tetramethyl-1,1'-spirobisindane (TTSBI) powders  
162 (26 g) and methanol (MeOH, 140 g) were mixed into a conical flask with a stirrer. Then  
163 the bottle was placed on a 65 °C heater and stirred for 4 hours. After finishing above  
164 process, the heater was turned off. Dichloromethane (DCM, 40 g) was added into the  
165 bottle. After 30 min, the bottle was placed in a refrigerator for 2 hours. Finally, the  
166 mixture was filtered and rinsed by methanol to obtain purified TTSBI. 2,3,5,6-  
167 Tetrafluoroterephthalonitrile (TFTPn) was purified via sublimation using a homemade  
168 equipment.

### 169 **1.4.2 synthesis of PIM-1 powders**

170 The typical procedure for synthesis of PIM-1 was carried out as follows: TTSBI (1.55  
171 g, 4.5 mmol), TFTPn (0.91 g, 4.5 mmol), and  $\text{K}_2\text{CO}_3$  (2.51 g, 18.0 mmol), and freshly  
172 distilled DMF (30 mL) were added to a 50 mL round-bottomed flask equipped with a  
173 magnetic stirrer, a nitrogen inlet and a reflux condenser. The system was purged with  
174  $\text{N}_2$  and then the  $\text{N}_2$  inlet was removed and the mixture was placed on a hot stirring plate  
175 and stirred at 600 rpm. The mixture was heated to 100 °C and 1.0 mL toluene was added  
176 to the system and maintained at this temperature for 24 h to ensure high molecular



177 polymers. With the polymerization process, a yellowish suspension was gradually  
178 obtained. Then the solution was cooled down to room temperature and carefully poured  
179 into 300 mL deionized water with a vigorously stirred magnetic stirrer to yield a  
180 powder-like precipitate. The residual  $K_2CO_3$  was removed by adding 1M HCl until  $CO_2$   
181 evolution stopped and pH was about 5. The recovered precipitate was filtered, then  
182 washed thoroughly with deionized water for several times until pH was about 7. After  
183 that, the orange precipitate was washed several times with methanol at 60 °C to remove  
184 the organic solvent. Finally, the orange solid dried at 80 °C under high vacuum for 12  
185 h.

### 186 **1.4.3 Fabrication of mixed-matrix membranes**

187 PIM-1-based MMMs were fabricated by a priming process. PIM-1 (0.2 g) was  
188 dissolved in  $CH_2Cl_2$  (9.8 g) to obtain a 2 wt% solution. MOF nanoparticles (2 mg) were  
189 dispersed in the above PIM-1 solution and violently stirred for 12 h to obtain a uniform  
190 dispersion. Finally, the casting solution was poured into a homemade mold with a glass  
191 lid to slow down its evaporation rate, and the evaporation process was controlled for 12  
192 h. The obtained membranes were dried for 12 h before the tests.

### 193 **1.4 Separation performance tests**

194 Separation performance tests were carried out by using a home-made gas permeability  
195 analyzer at 298 K. The prepared membrane with an effective area of 0.28 cm<sup>2</sup> was  
196 sealed and placed in the permeation cell by using an O-ring. Pure gas was used as the  
197 feed gas. The inlet pressure was regulated through an upstream vacuum pump, while  
198 the permeate side was vacuum-treated. Finally, the feed gas would pass through the 1 %

199 HC<sub>6</sub>-N<sub>3</sub>-CO<sub>2</sub>-Zn(NO)<sub>3</sub> mixed matrix membranes into the permeate side. Gas  
200 permeability (P) was calculated based on the membrane thickness, permeate time,  
201 permeate volume, transmembrane pressure, and effective membrane area. Selectivity  
202 ( $\alpha$ ) was calculated by the permeability of different gases (P<sub>i</sub> and P<sub>j</sub>):

$$203 \quad \alpha = P_i/P_j$$

### 204 **1.5 Characterizations of HC<sub>x</sub>-N<sub>y</sub>-CO<sub>2</sub>-Zn MOFs**

205 Powder X-ray diffraction (PXRD, Bruker D8 Advance) was employed to investigate  
206 the crystalline structure of MOFs powders in a 2 $\theta$  range of 5-50° utilizing Cu K- $\alpha$   
207 ( $\lambda=1.54 \text{ \AA}$ ) as the X-ray radiation source. The chemical structures of the synthesized  
208 HC<sub>x</sub>-N<sub>y</sub>-CO<sub>2</sub>-Zn MOFs were identified using a Bruker Tensor II Fourier transform  
209 infrared spectrometer with a wavenumber range of 400-4000 cm<sup>-1</sup>. X-ray photoelectron  
210 spectroscopy (XPS, Kratos AXIS SUPRA+) equipped with an Al K $\alpha$  X-ray source  
211 (1486.6 eV) was used to analyze the chemical structure and element composition of  
212 MOFs. The morphology of the starting material and MOFs were further determined by  
213 field emission scanning electron microscopy (FESEM, Quanta FEG 250). The  
214 dispersion of samples was of great importance for SEM characterizations to obtain the  
215 desired morphology. A variety of MOFs powders were uniformly dispersed by  
216 ultrasonication for a certain time using different organic solvents before being dripped  
217 onto a silicon wafer. All samples were sprayed with Pt/Pd alloy for 40 s using an auto  
218 fine coater (208 HR, TED PELLA, INC.) and operating at a 20 mA current to enhance  
219 the definition of SEM images. The thermal stability of different MOFs was evaluated  
220 by a thermogravimetric analyzer (DTG-60H, SHIMADZU) in the temperature range of

221 25-800 °C with a heating ramp of 10 °C min<sup>-1</sup> under a flowing N<sub>2</sub> atmosphere  
222 accompanying a flow of 50 mL min<sup>-1</sup>. Field emission transmission electron microscopy  
223 images were obtained by a Talos F200X field emission transmission electron  
224 microscope at an accelerating voltage of 200 kV. Solvent-dispersed MOFs powders  
225 were loaded on copper grids for FE-TEM imaging. <sup>1</sup>H NMR spectra were recorded on  
226 a Bruker Avance-600 (600 MHz) spectrometer. Chemical shifts were expressed in  
227 p.p.m. downfield from tetramethylsilane (TMS) at δ = 0 p.p.m. and J values are given  
228 in Hz. The free volume size and distribution of the membranes were detected by  
229 positron annihilation lifetime spectroscopy (PALS). <sup>22</sup>Na isotope was employed as  
230 positron and γ-ray (1275 keV) sources. The membrane samples were cut into pieces of  
231 1 × 1 cm, and the thickness of each sample was stacked into a total thickness of  
232 approximately 1 mm.

233

234

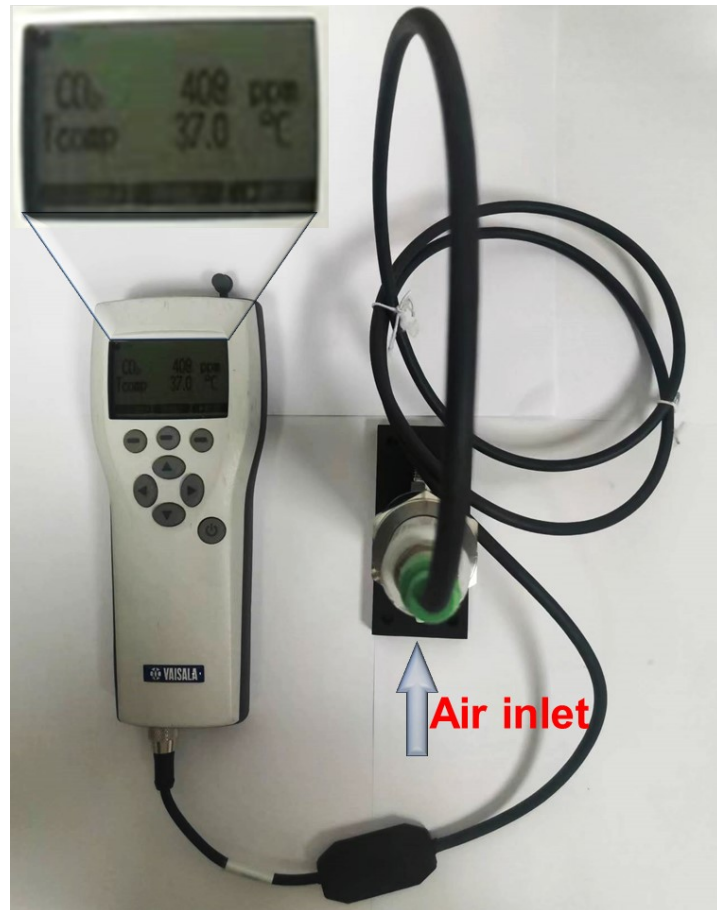

235

236 **Figure S1.** Measurements of CO<sub>2</sub> concentration in the atmosphere by using a  
237 nondispersive infrared CO<sub>2</sub> meter (GMP252, Vaisala GmbH). The testing result was  
238 408 ppm.

239

240

241

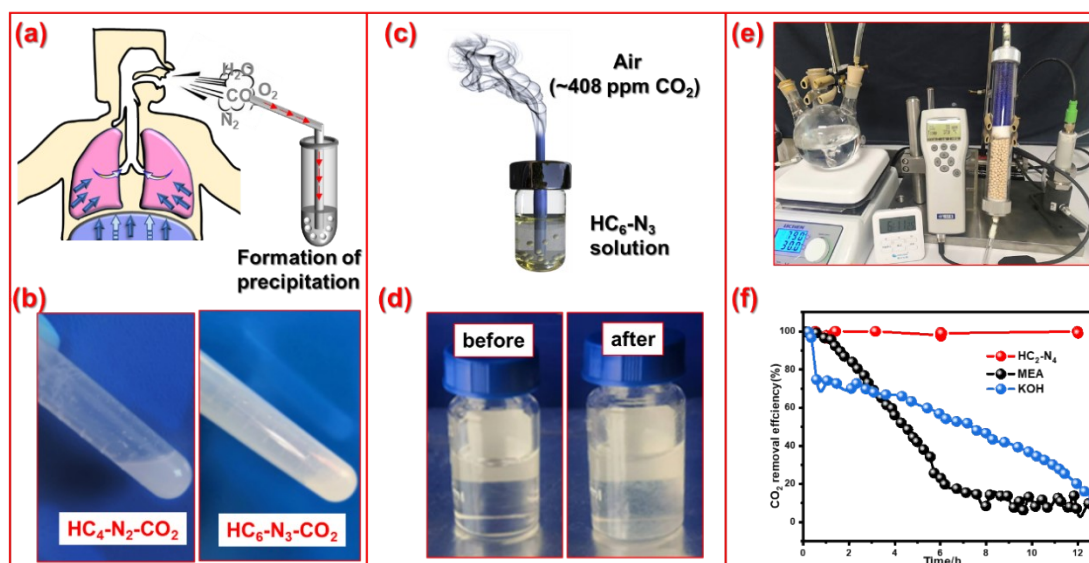

242

243 **Figure S2. Visible DAC capacity analysis of  $HC_x-N_y$ .** (a) Model diagram and (b)

244 Digital images after  $HC_4-N_2$  and  $HC_6-N_3$  adsorbents absorbing  $CO_2$  exhaled by a human

245 body. (c) Model diagram of the experimental apparatus to capture  $CO_2$  existing in the

246 atmosphere. (d) Changes in the form of  $HC_6-N_3$  before (left side) and after (right side)

247  $CO_2$  captured in the atmosphere by comparing their digital images. (e) The  $CO_2$

248 absorption testing system including air source, absorption reactor and detection system.

249 (f) The  $CO_2$  removal efficiency of  $HC_4-N_2$ , MEA, and KOH as a function of time.

250

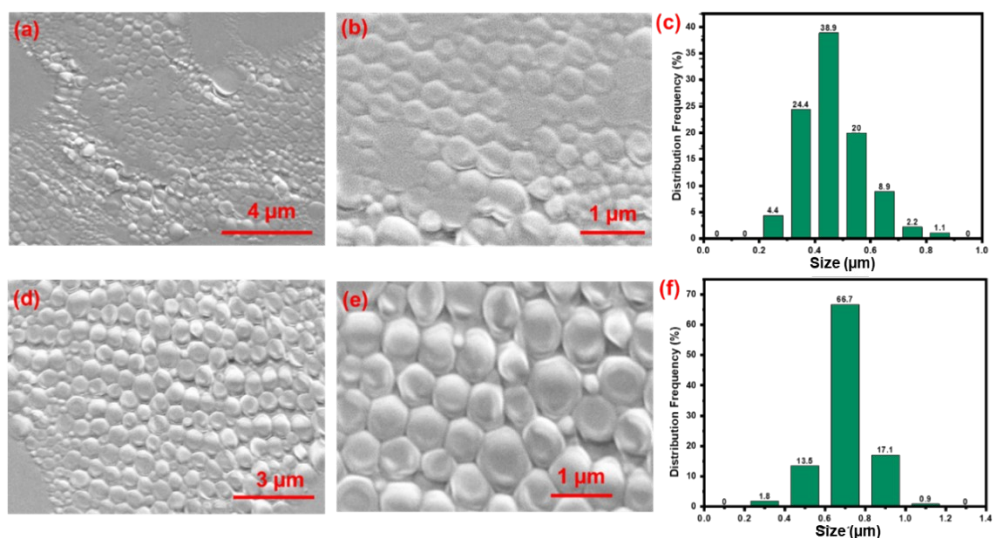

251

252 **Figure S3.** a, b, FESEM pictures and C, Size distribution of  $\text{HC}_4\text{-N}_2\text{-CO}_2$  obtained in

253 the atmosphere at different magnifications. d, e, FESEM pictures and f, Size

254 distribution of  $\text{HC}_6\text{-N}_3\text{-CO}_2$  obtained in the atmosphere at different magnifications.

255 Size distributions in c and f were measured by a software.

256

257

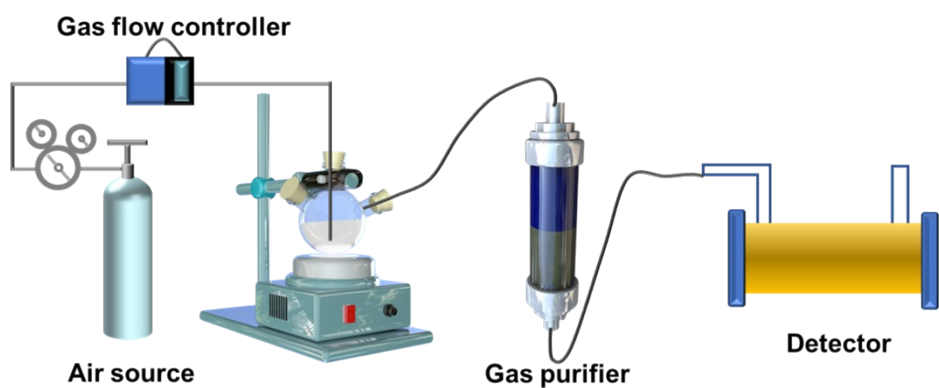

258

259 **Figure S4.** Schematic diagram of the  $\text{CO}_2$  absorption testing system for the DAC

260

process.

261

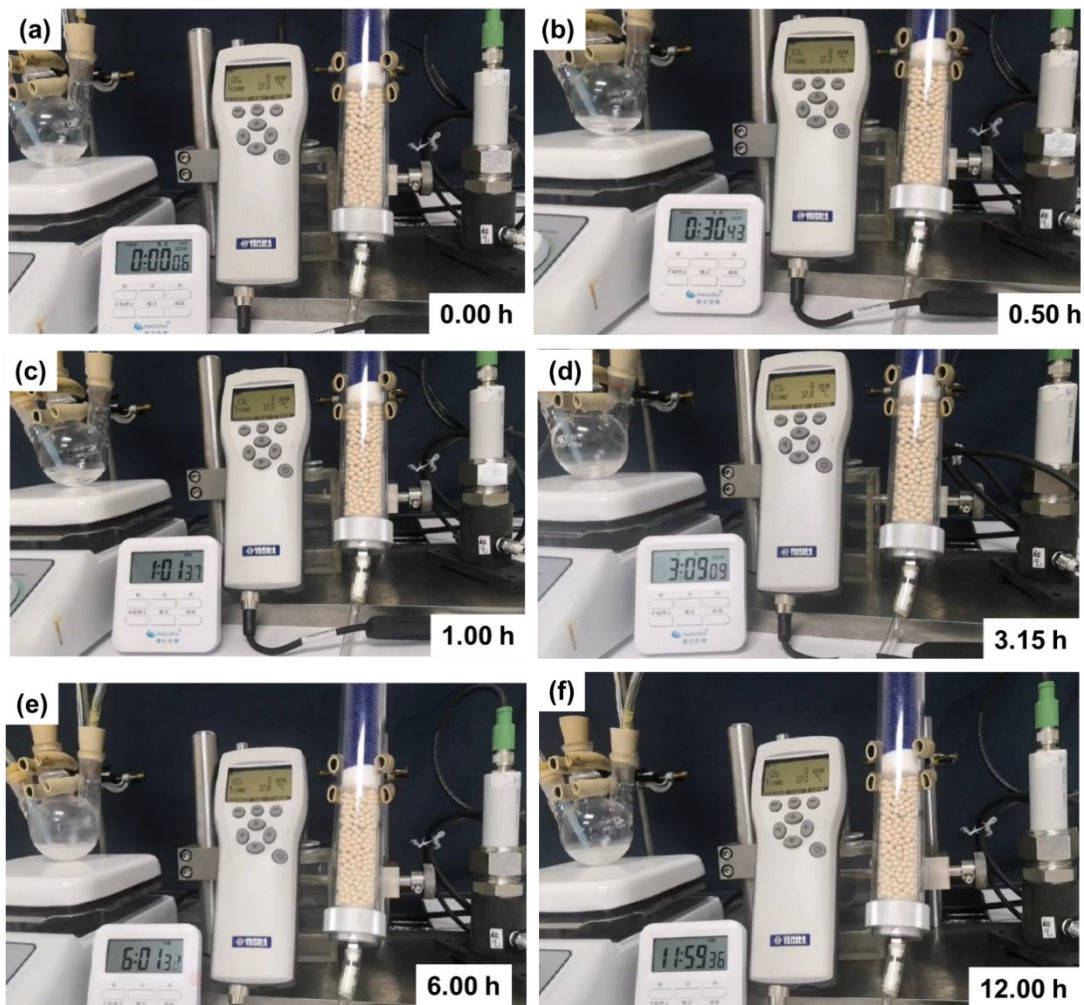

262

263 **Figure S5.** Photographs of the DAC process by using HC<sub>4</sub>-N<sub>2</sub> in MeCN solutions

264 under air sources. a, 0.00 h. b, 0.50 h. c, 1.00 h. d, 3.15 h. e, 6.00 h. f, 12.00 h. The

265 downstream CO<sub>2</sub> concentration was monitored by using a nondispersive infrared CO<sub>2</sub>

266 meter (GMP252, Vaisala GmbH).

267

268

269

270

271

272

273 **Table S1.** Comparison of CO<sub>2</sub> absorption performance of HC<sub>x</sub>-N<sub>y</sub> and other high  
 274 performing adsorbents reported in the literature.

| Material class                   | Material                         | P <sub>CO<sub>2</sub></sub> (mbar) | T (°C) | g/kg   | mol/Kg | Reference |
|----------------------------------|----------------------------------|------------------------------------|--------|--------|--------|-----------|
| Metal-organic frameworks         | Te- Mg <sub>2</sub> (dobpdc)     | 50                                 | 90     | 149.6  | 3.4    | [S3]      |
|                                  | Mg <sub>2</sub> (dobdc)          | 50                                 | 95     | 35.2   | 0.8    | [S4]      |
|                                  | CALF-20                          | 1200                               | 20     | 179.1  | 4.1    | [S5]      |
| Zeolites                         | 13X-IO10                         | 900                                | 30     | 46.2   | 1.1    | [S6]      |
|                                  | 13X-IO20                         | 900                                | 30     | 65.1   | 1.5    | [S6]      |
|                                  | Na-GIS-3.0                       | 200                                | 25     | 162.8  | 3.7    | [S7]      |
| Ionic liquid                     | Graphene/IL                      | 1000                               | 25     | 374.0  | 8.5    | [S8]      |
|                                  | [DEEA][Pent]                     | 4000                               | 60     | 10.6   | 0.2    | [S9]      |
|                                  | P-DVB-AEImOH                     | 1000                               | 25     | 43.6   | 1.0    | [S10]     |
| Amine-decorated mesoporous solid | Mesoporous Silica                | 50                                 | 60     | 143.0  | 3.3    | [S11]     |
|                                  | TEPA-MCM-41                      | 129                                | 75     | 140.8  | 3.2    | [S12]     |
|                                  | SWIRL-TEPA                       | 50                                 | 95     | 176.0  | 4.0    | [S13]     |
|                                  |                                  | 100                                | 106    | 176.0  | 4.0    | [S14]     |
| Aza-fused π-conjugated networks  | CTF-1-500                        | -                                  | 25     | 98.1   | 2.2    | [S15]     |
|                                  | Bipy-CTF600                      | -                                  | 25     | 129.8  | 3.0    | [S15]     |
|                                  | O-Doped CTFs                     | 1000                               | 24     | 211.2  | 4.8    | [S16]     |
| Amine adsorbent                  | IPDA                             | -                                  | 25     | 279.0  | 6.3    | [S17]     |
|                                  | MEA                              | -                                  | 25     | 446.6  | 10.2   | [S17]     |
| HC <sub>x</sub> -N <sub>y</sub>  | HC <sub>4</sub> -N <sub>2</sub>  | 100                                | 25     | 1048.0 | 23.8   | This work |
|                                  | HC <sub>6</sub> -N <sub>3</sub>  | 100                                | 25     | 1047.6 | 23.8   | This work |
|                                  | HC <sub>10</sub> -N <sub>4</sub> | 100                                | 25     | 898.0  | 20.4   | This work |

275 -: not available

276

277

278

279



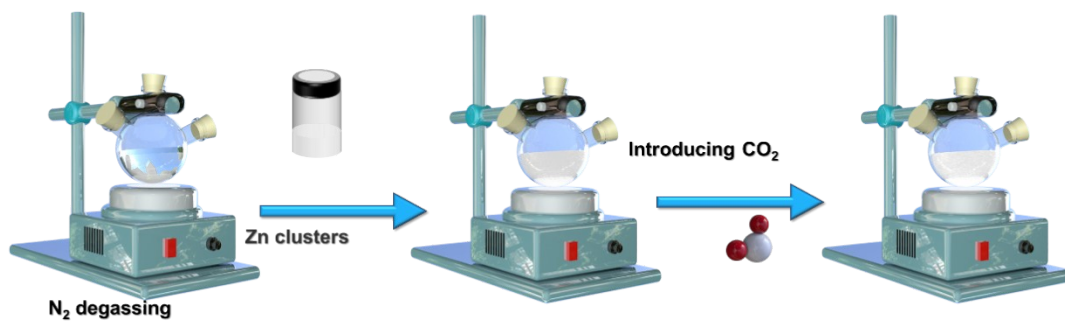

280

281 **Figure S6.** Diagram of the experimental device and the schematic diagram to prepare

282 MOFs from CO<sub>2</sub>, Zn clusters and HC<sub>x</sub>-N<sub>y</sub>.

283

284

285

286

287

288

289

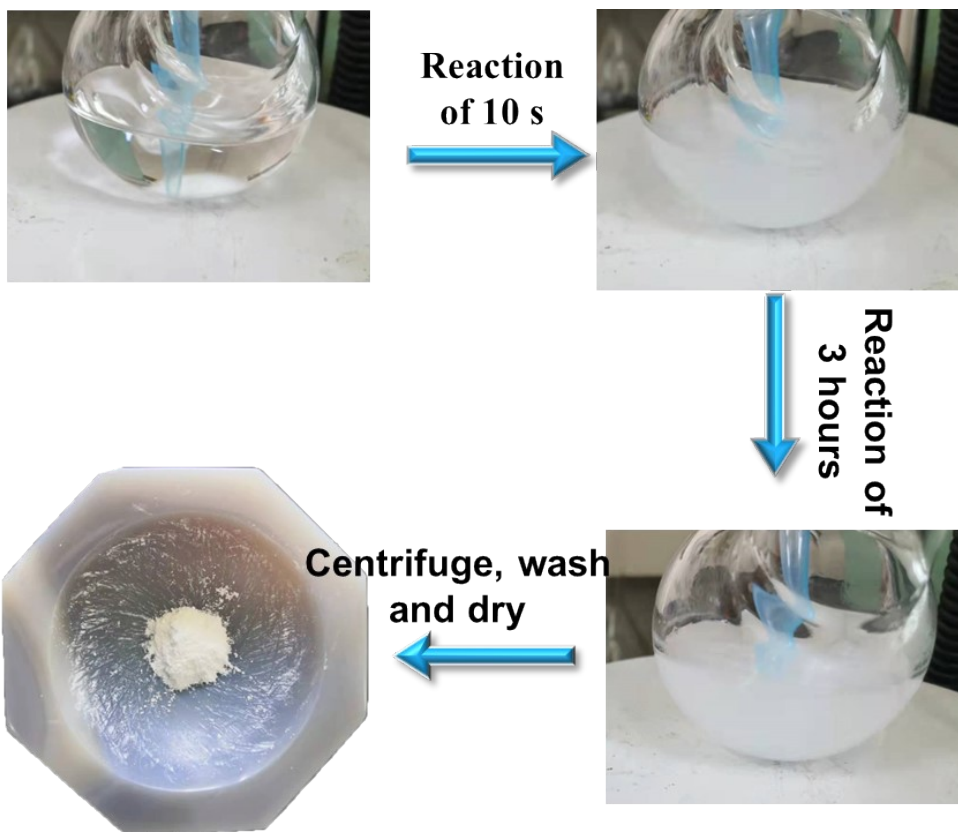

290

291 **Figure S7.** Flow diagrams of the preparation process for  $\text{HC}_4\text{-N}_2\text{-CO}_2\text{-Zn(OAC)}_2$ .

292

293

294

295

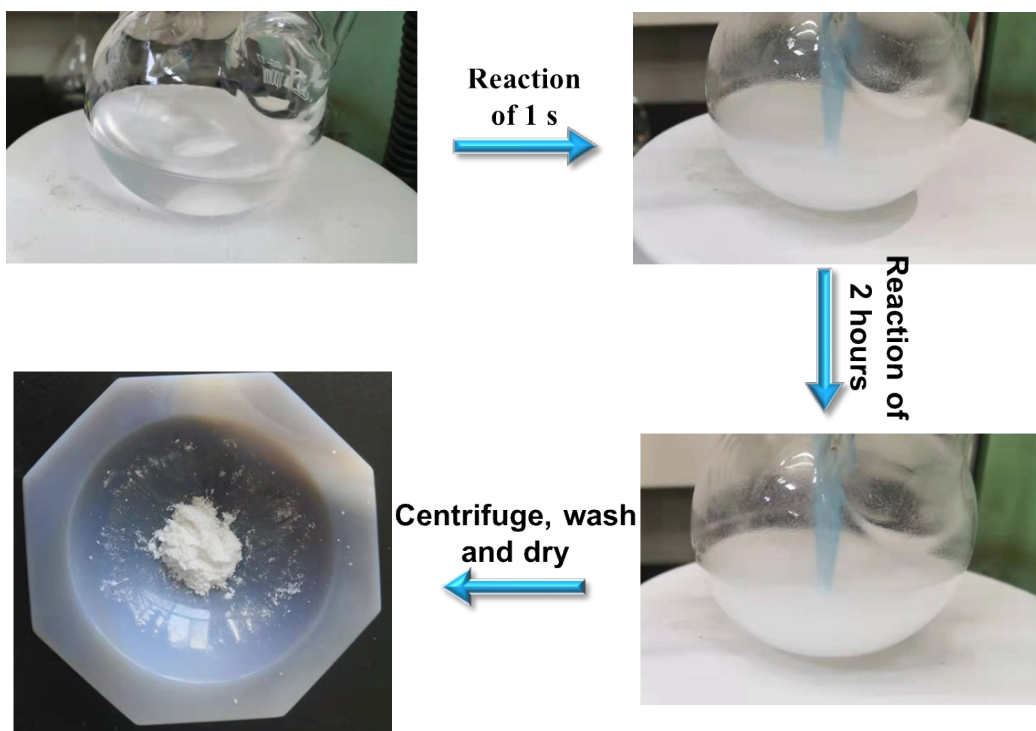

296

297 **Figure S8.** Flow diagrams of the preparation process for  $\text{HC}_6\text{-N}_3\text{-CO}_2\text{-Zn(OAC)}_2$ .

298

299

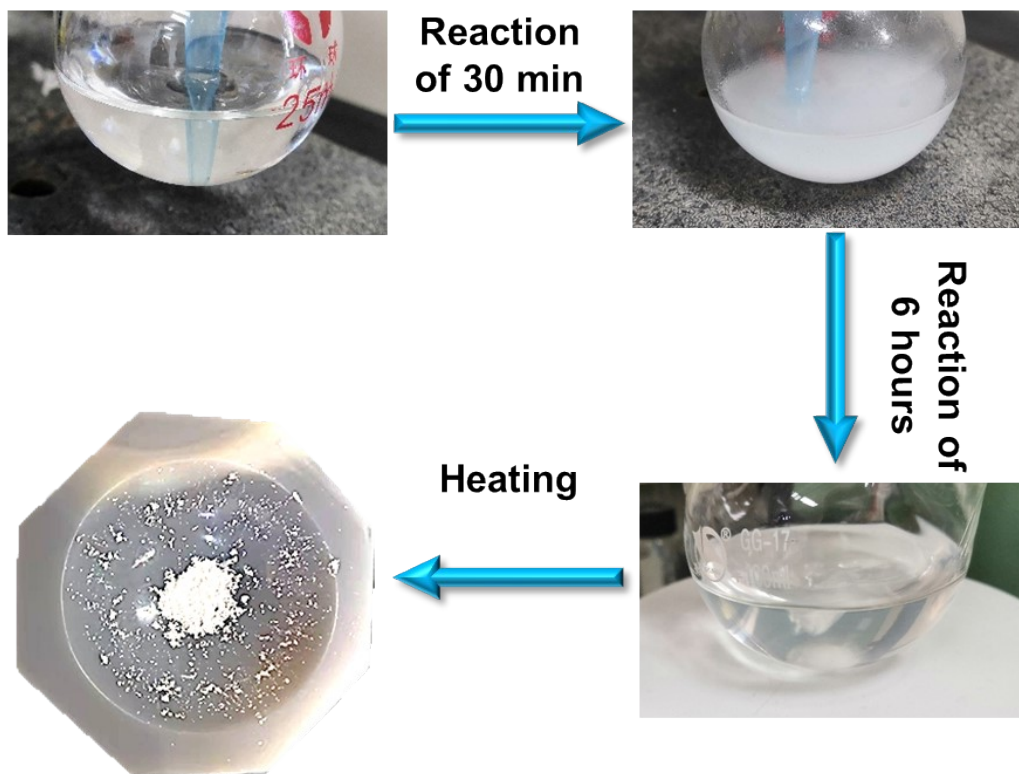

300

Figur

301

e S9. Flow diagrams of the preparation process for  $\text{HC}_{10}\text{-N}_4\text{-CO}_2\text{-Zn(OAC)}_2$ .

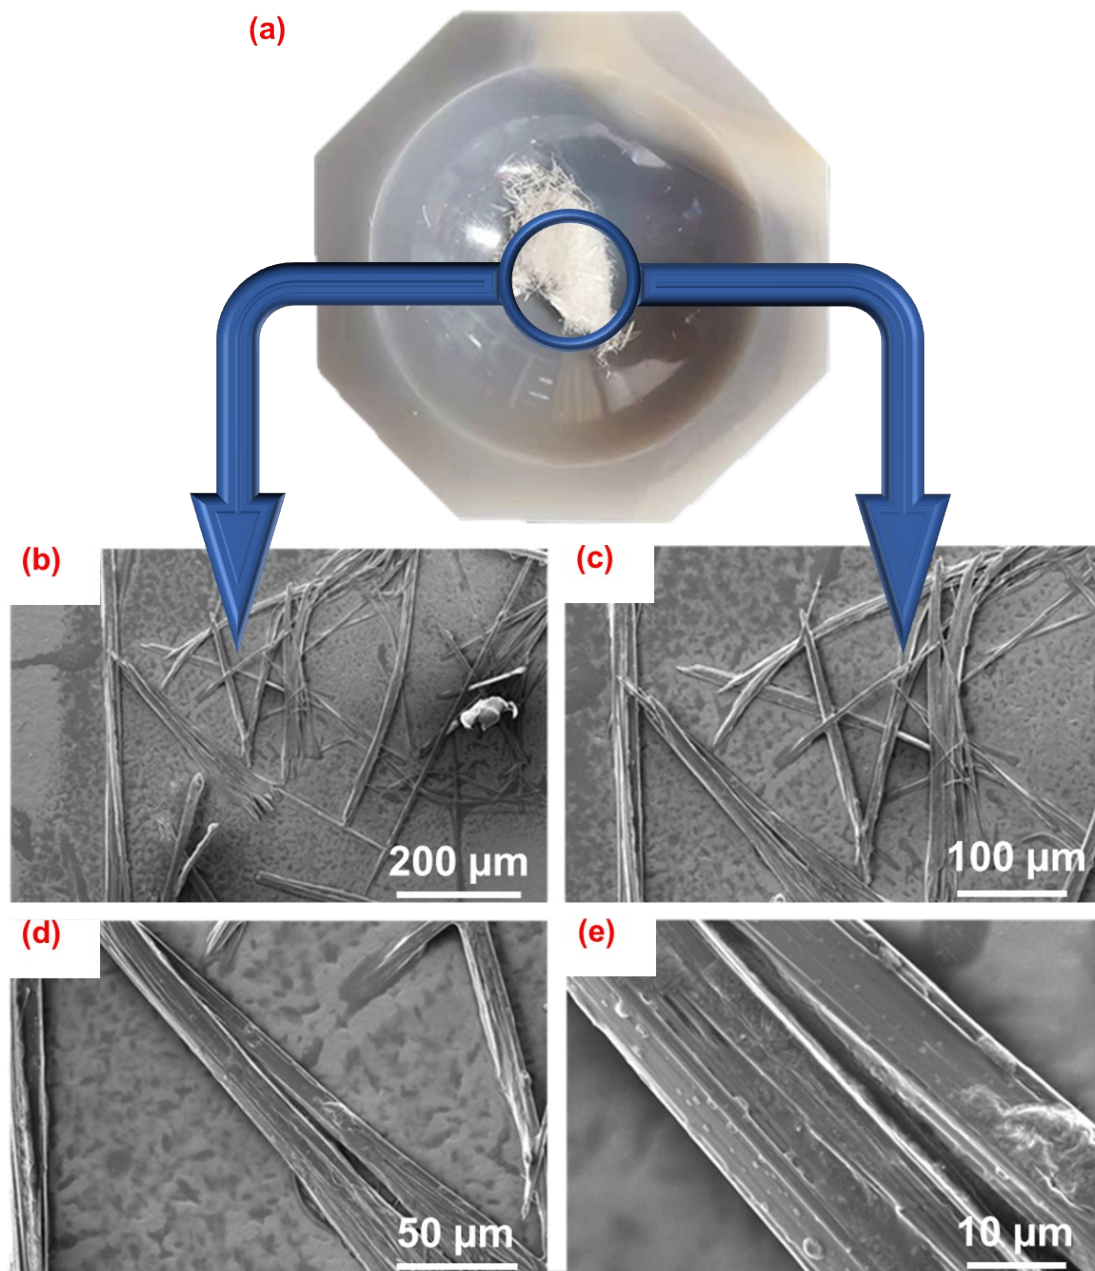

302

303 **Figure S10.** (a) Digital picture and (b-e) SEM images of HC<sub>10</sub>-N<sub>4</sub> at different

304 magnifications.

305

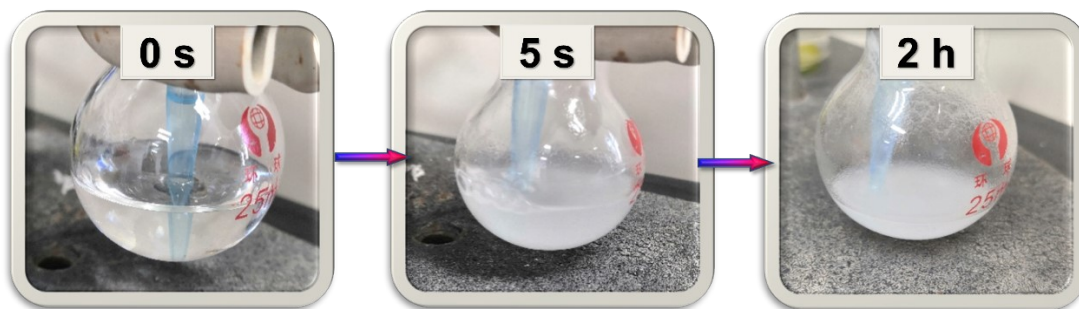

306

307 **Figure S11.** Digital images of reaction at reaction durations of 0 s, 5 s and 2 h in the

308  $\text{HC}_6\text{-N}_3$  reaction system.

309

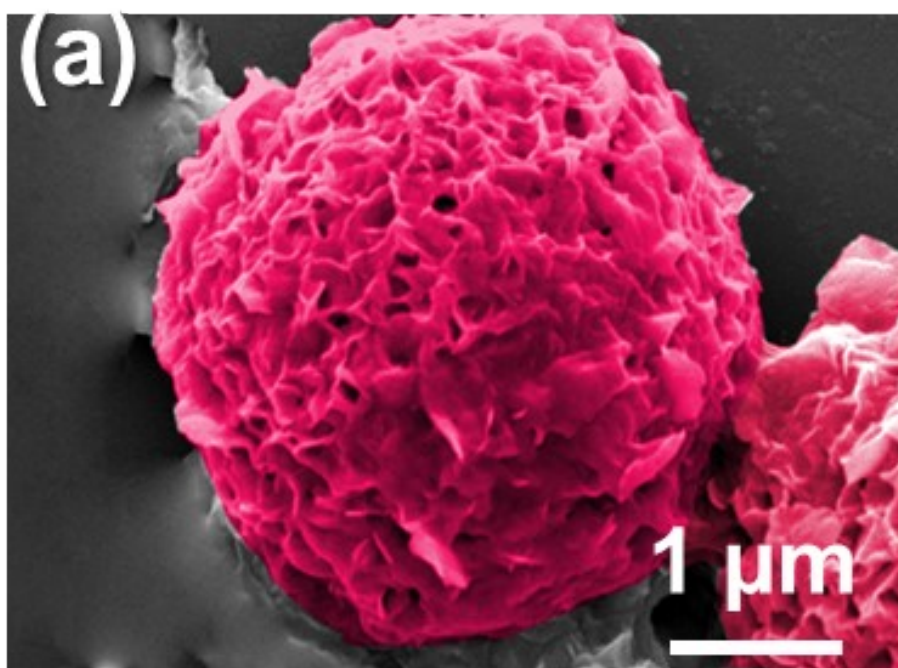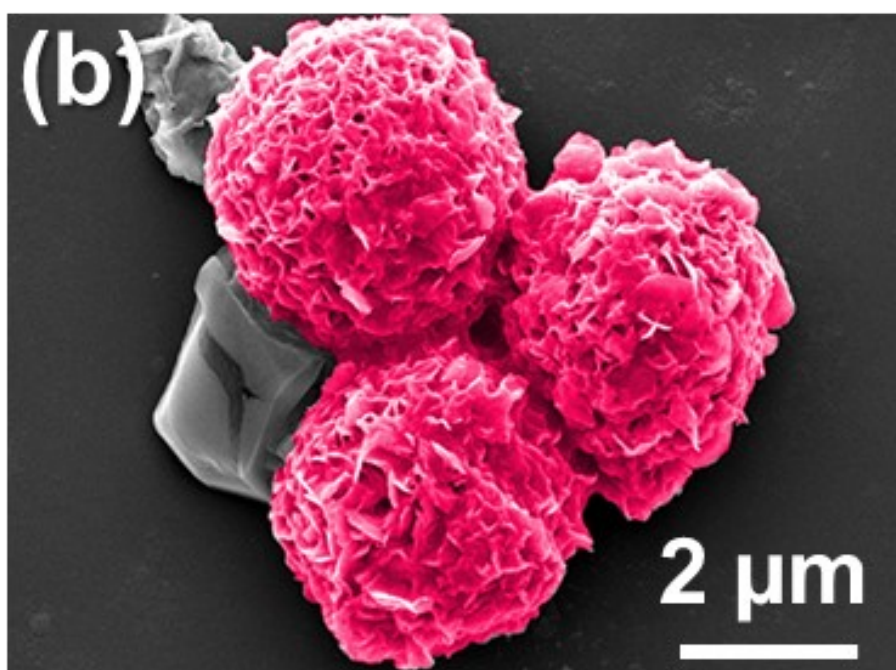

310

311

312 **Figure S12.** FESEM images of  $\text{HC}_4\text{-N}_2\text{-CO}_2\text{-ZnSO}_4$ . FESEM images were colored

313 red for visual effect.

314

315 **Table S2.** A comparison of N content of different amines reported in the state-of-the-  
 316 art literature.

| Entry | Name                             | Structure                                                                           | N content <sub>a</sub> | Reference    |
|-------|----------------------------------|-------------------------------------------------------------------------------------|------------------------|--------------|
| 1     | MEA                              | 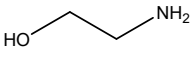   | 0.229                  | [S18]        |
| 2     | IPDA                             |    | 0.165                  | [S18]        |
| 3     | Cyclohexane-1, 3-diamine         |    | 0.246                  | [S18]        |
| 4     | DMAPA                            |    | 0.159                  | [S19]        |
| 5     | Lysine                           |   | 0.171                  | [S20]        |
| 6     | 2-methylpiperidine               |  | 0.141                  | [S21]        |
| 7     | MMEA                             |  | 0.237                  | [S22]        |
| 8     | DEAB                             |  | 0.097                  | [S22]        |
| 9     | MDEA                             |  | 0.118                  | [S23]        |
| 10    | HC <sub>4</sub> -N <sub>2</sub>  |  | 0.326                  | In this work |
| 11    | HC <sub>6</sub> -N <sub>3</sub>  |  | 0.326                  | In this work |
| 12    | HC <sub>10</sub> -N <sub>4</sub> |  | 0.280                  | In this work |

317 **a** represent the mass ratio of N to the molecular mass

318

319

320

321

322



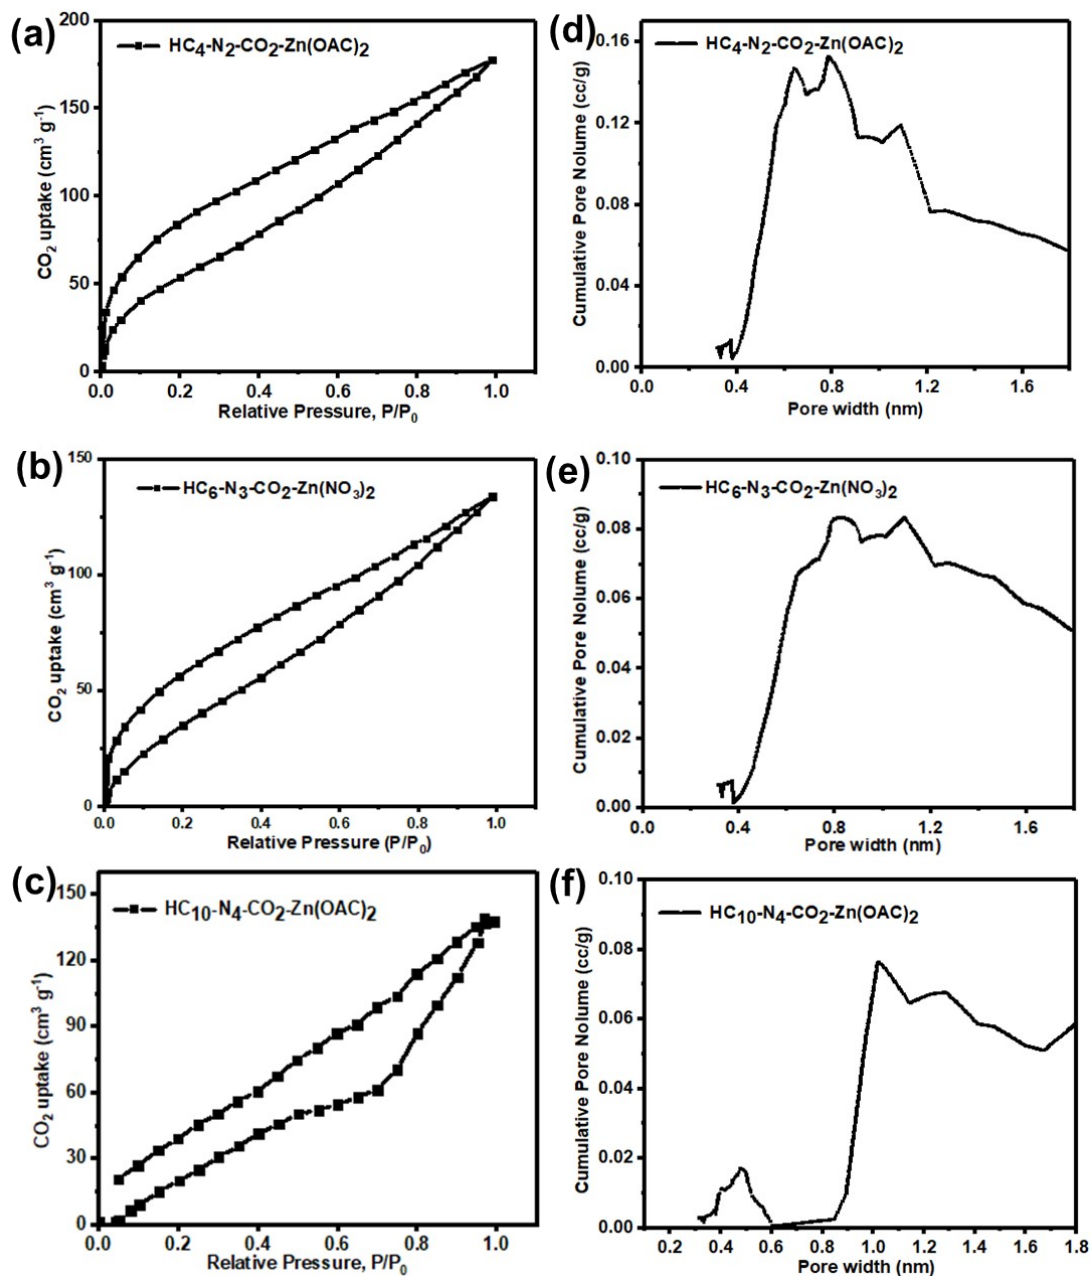

323

324 **Figure S13** BET surface areas and pore sizes of the synthesized (a, d) HC<sub>4</sub>-N<sub>2</sub>-CO<sub>2</sub>-

325 Zn(OAC)<sub>2</sub>, (b, e) HC<sub>6</sub>-N<sub>3</sub>-CO<sub>2</sub>-Zn(NO<sub>3</sub>)<sub>2</sub>, (c, f) HC<sub>10</sub>-N<sub>4</sub>-CO<sub>2</sub>-Zn(OAC)<sub>2</sub> MOFs.

326 Notice: Aperture of MOFs is mainly less than 2 nm (micropore), so we choose the

327 CO<sub>2</sub> isotherm. The temperature of CO<sub>2</sub> isotherm was 195 K. Horvath-Kawazoe (HK)

328 method was used to test the micropores of MOFs.

329

330

331  
332  
333  
334  
335

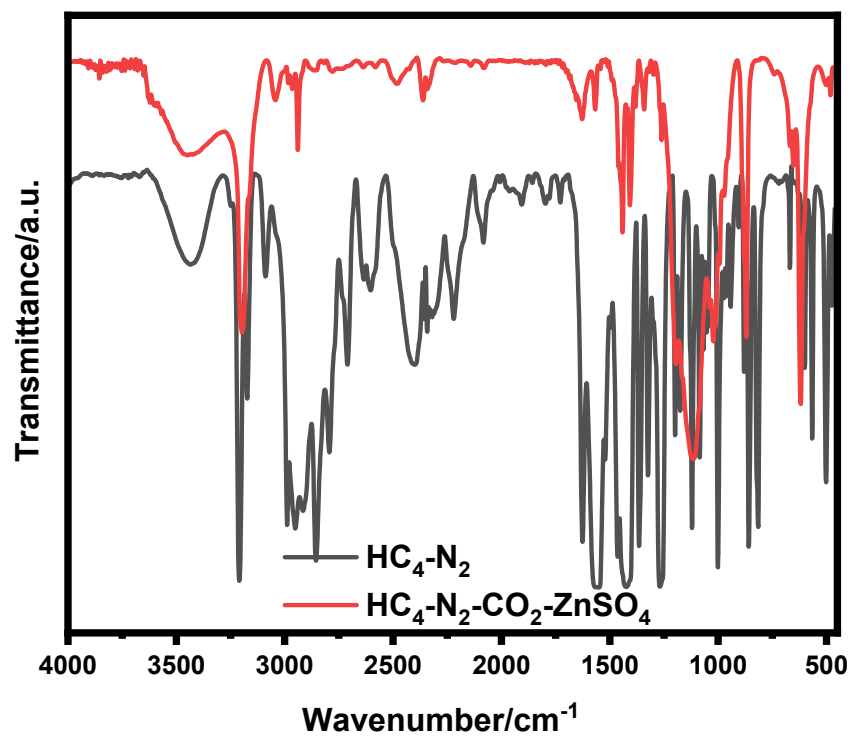

336

337 **Figure S14.** FT-IR spectra of HC<sub>4</sub>-N<sub>2</sub> and HC<sub>4</sub>-N<sub>2</sub>-CO<sub>2</sub>-ZnSO<sub>4</sub>.

338

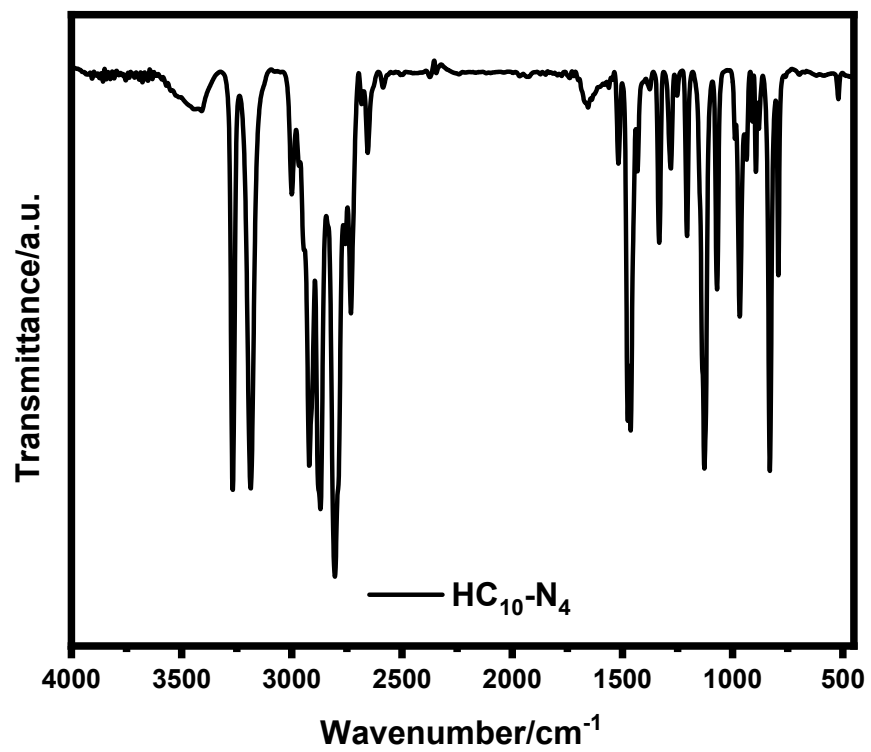

339

340

341 **Figure S15.** FT-IR spectra of HC<sub>10</sub>-N<sub>4</sub>.

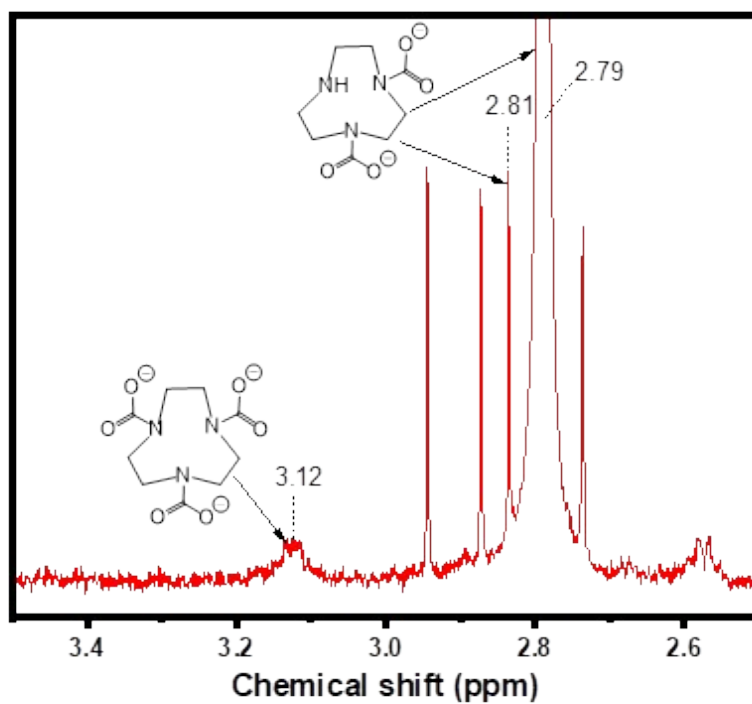

342

343 **Figure S16.** <sup>1</sup>H NMR spectrum of HC<sub>6</sub>-N<sub>3</sub>-CO<sub>2</sub>-Zn(OAc)<sub>2</sub> dissolved in CDCl<sub>3</sub> at T =

344 298 K.

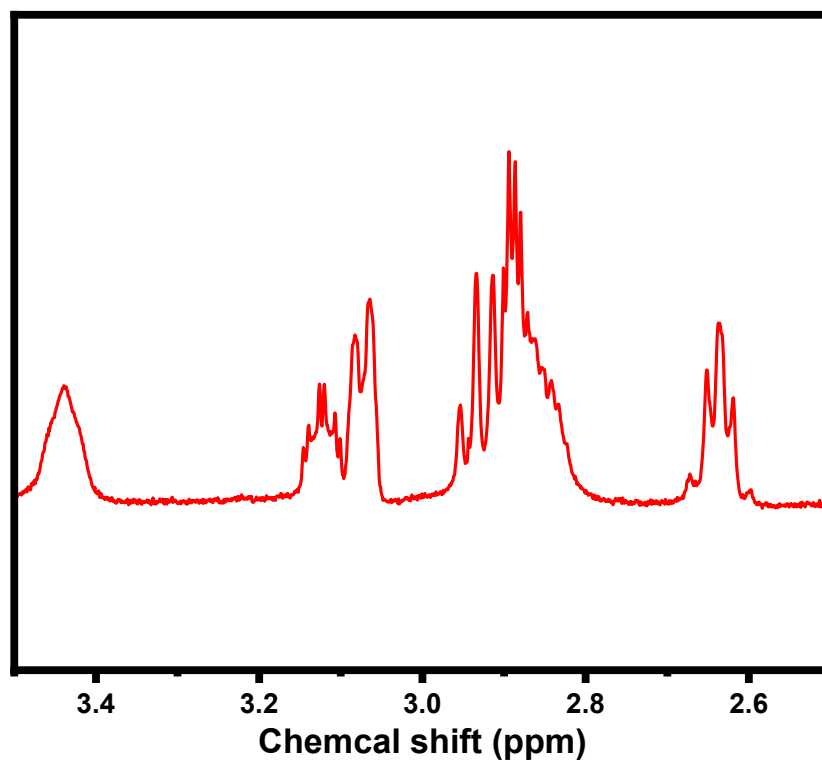

345

346 **Figure S17.** <sup>1</sup>H NMR spectrum of HC<sub>10</sub>-N<sub>4</sub>-CO<sub>2</sub>-Zn(OAC)<sub>2</sub> dissolved in CDCl<sub>3</sub> at T

347

= 298 K.

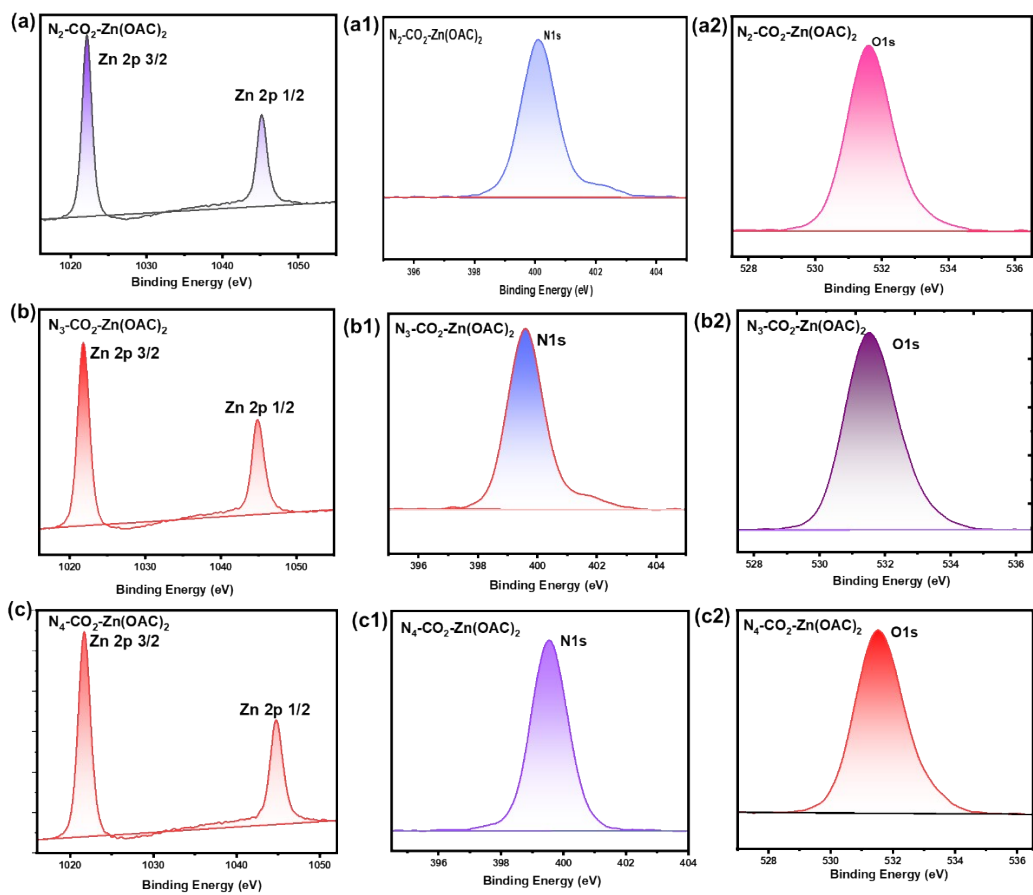

348

349 **Figure S18.** Fine Zn 2p, N 1s, O 1s XPS spectra of different MOFs samples. **a-a2**,

350  $\text{HC}_4\text{-N}_2\text{-CO}_2\text{-Zn(OAC)}_2$ . **b-b2**,  $\text{HC}_6\text{-N}_3\text{-CO}_2\text{-Zn(OAC)}_2$ . **c-c2**,  $\text{HC}_{10}\text{-N}_4\text{-CO}_2\text{-}$

351

$\text{Zn(OAC)}_2$ .

352

353

354

355

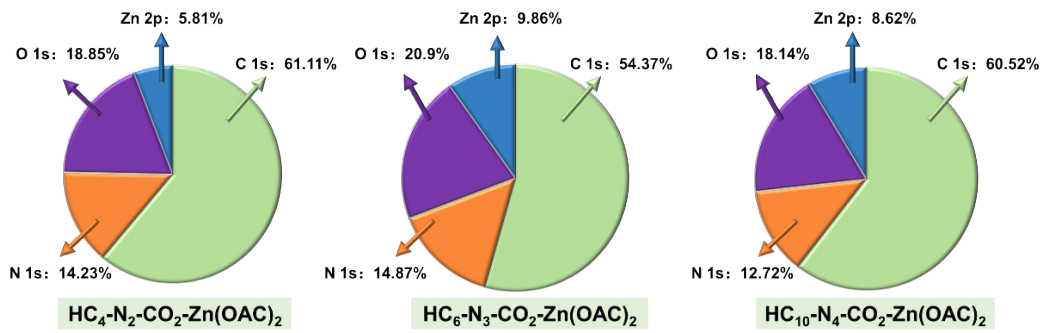

356

357 **Figure S19.** Pie charts of different atomic ratios in different MOFs.

358

359

360

361

362

363

364

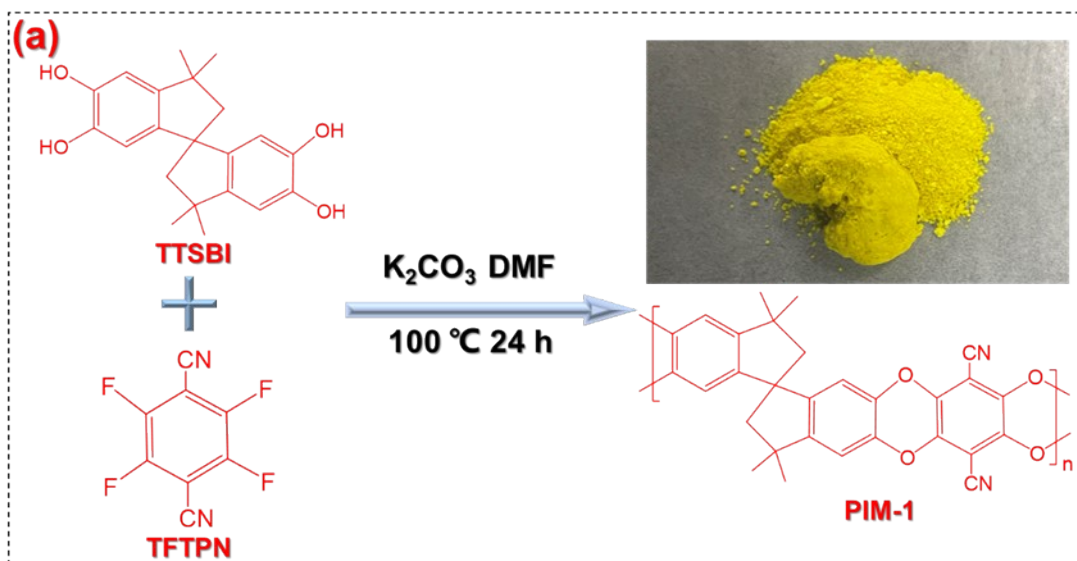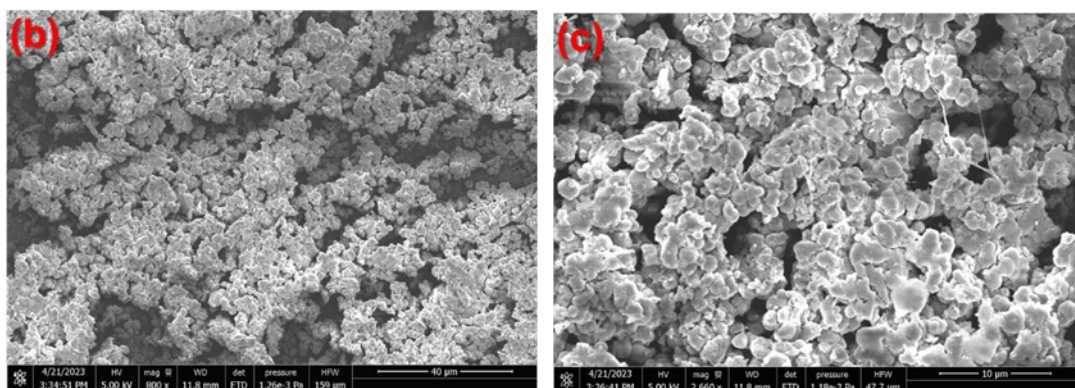

365

366 **Figure S20.** Synthesis and SEM pictures of PIM-1.

367 TTSBI: 5,5',6,6'-tetrahydroxy-3,3,3',3' tetramethylspirobisindane; TTFPN: 2,3,5,6-

368 tetrafluoroterephthalonitrile; Solvent was dimethylformamide.

369

370

371

372

373

374

375



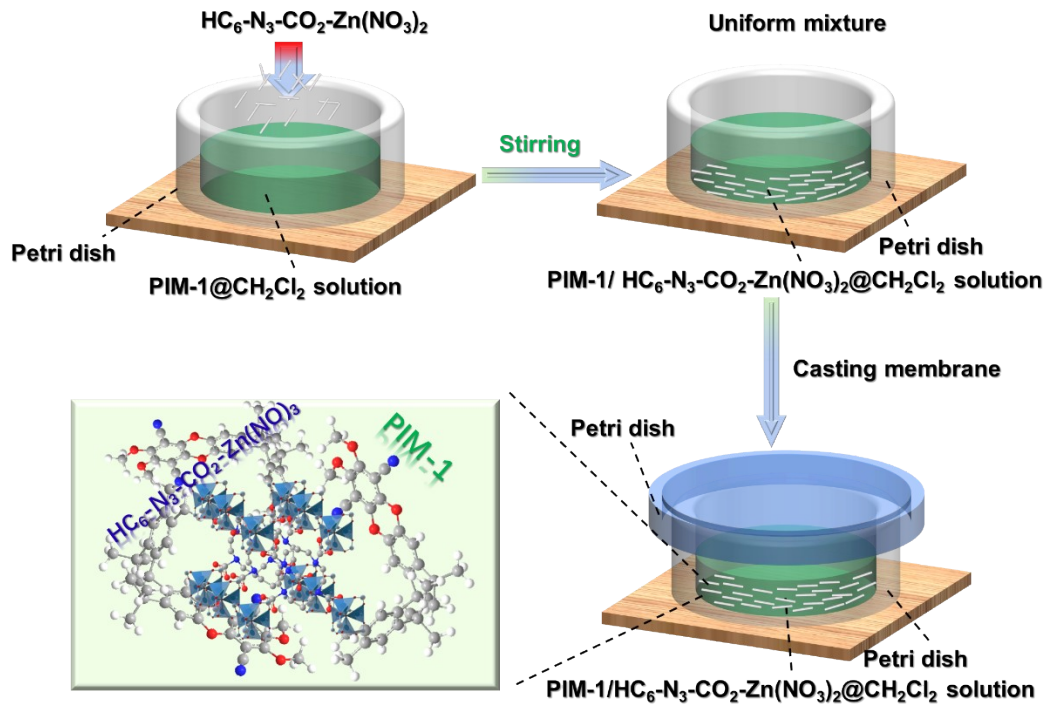

376

377 **Figure S21** Preparation diagram of PIM-1/HC<sub>6</sub>-N<sub>3</sub>-CO<sub>2</sub>-Zn(NO<sub>3</sub>)<sub>2</sub> (1%) MMMs

378

379

380

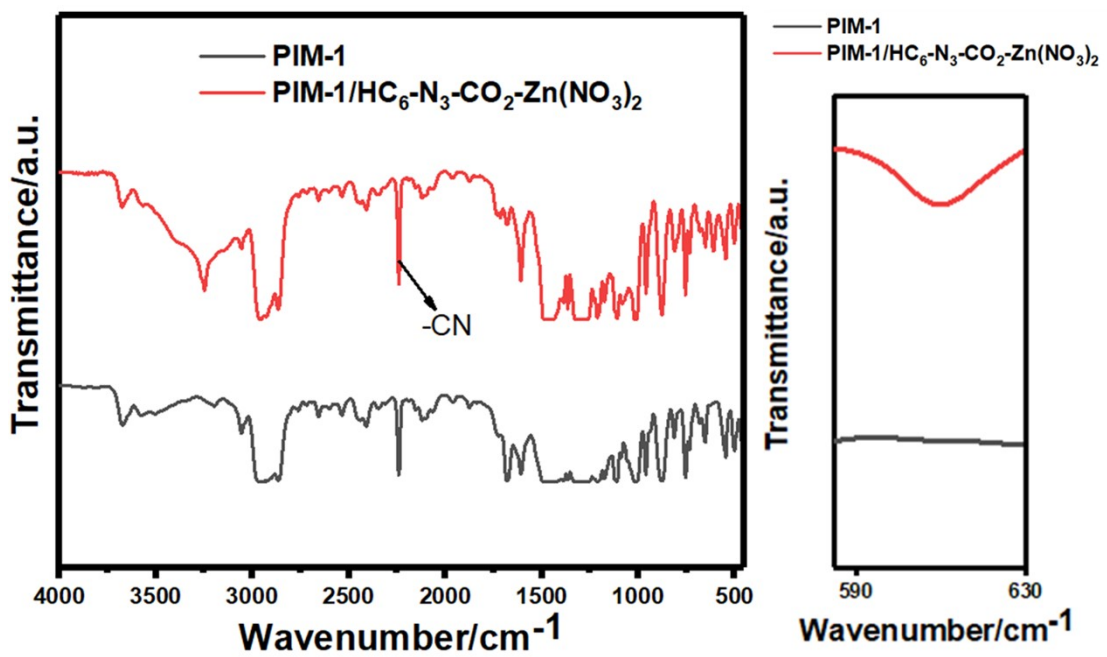

381

382

383 **Figure S22.** FTIR spectra of the pure PIM-1 and PIM-1/HC<sub>6</sub>-N<sub>3</sub>-CO<sub>2</sub>-Zn(NO<sub>3</sub>)<sub>2</sub> (1%)  
384 MMMs.

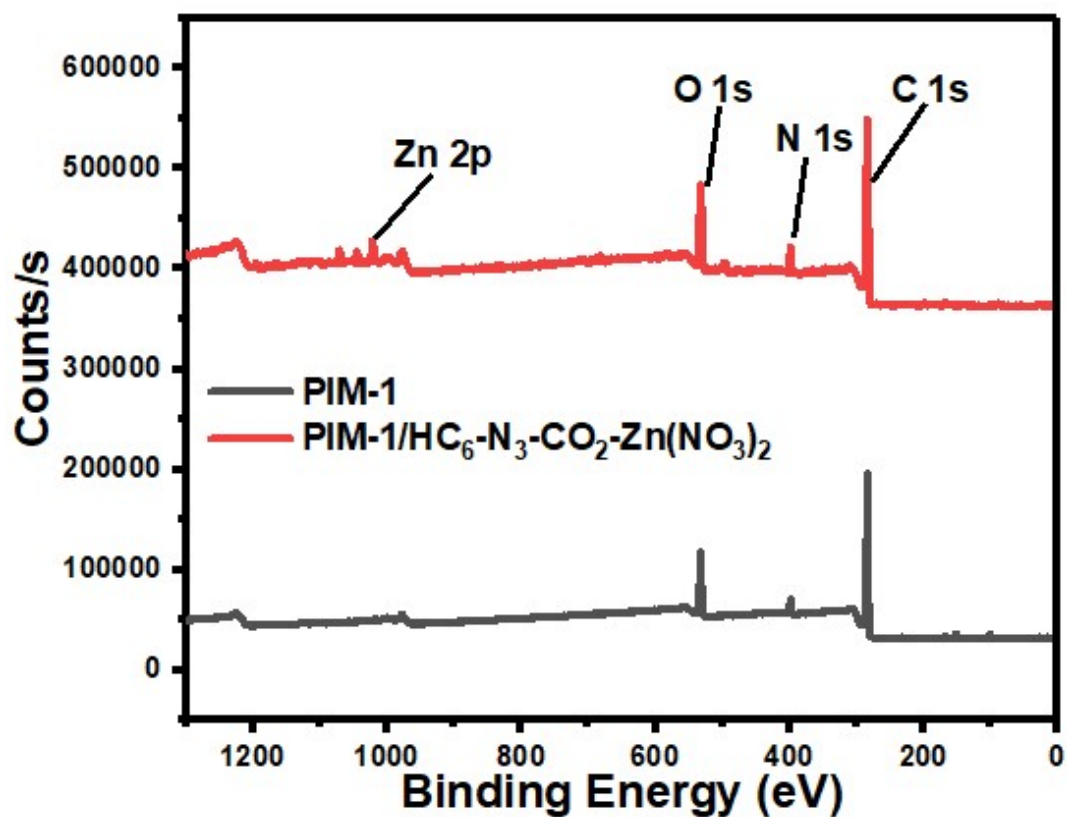

385  
386

387 **Figure S23.** XPS survey spectra of the pure PIM-1 membrane and PIM-1/HC<sub>6</sub>-N<sub>3</sub>-CO<sub>2</sub>-  
388 Zn(NO<sub>3</sub>)<sub>2</sub>.

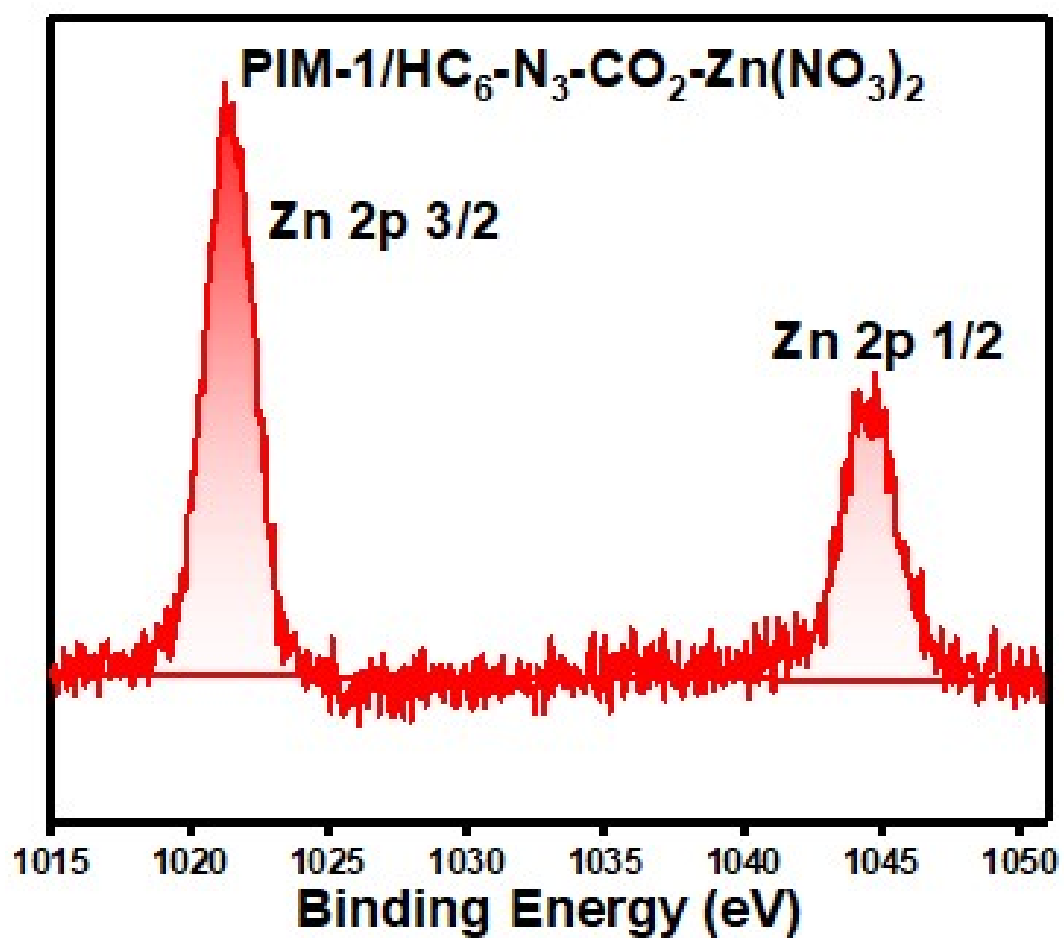

389

390 **Figure S24.** Fine Zn 2p XPS spectra of PIM-1/HC<sub>6</sub>-N<sub>3</sub>-CO<sub>2</sub>-Zn(NO<sub>3</sub>)<sub>2</sub> (1%) MMMs.

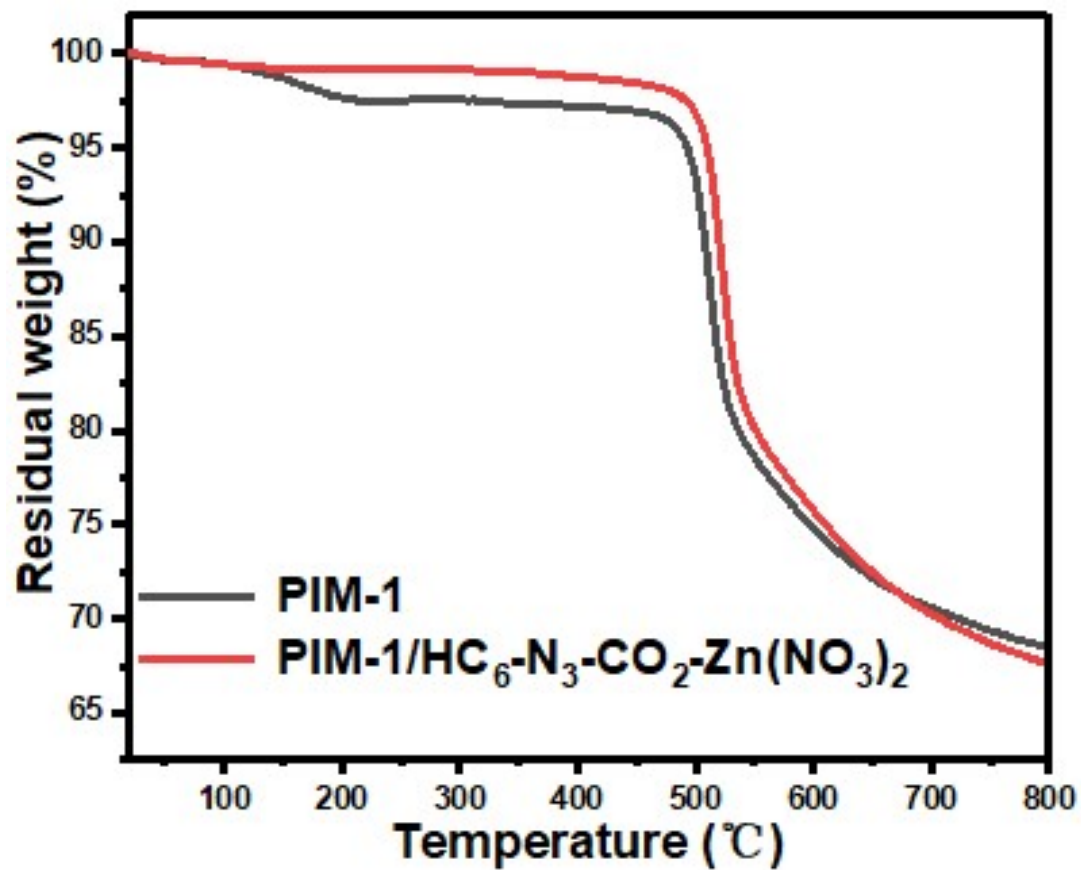

391

392

393

394 **Figure S25.** TGA of the pure PIM-1 membrane and PIM-1/HC<sub>6</sub>-N<sub>3</sub>-CO<sub>2</sub>-Zn(NO<sub>3</sub>)<sub>2</sub>

395 (1%) MMMs.

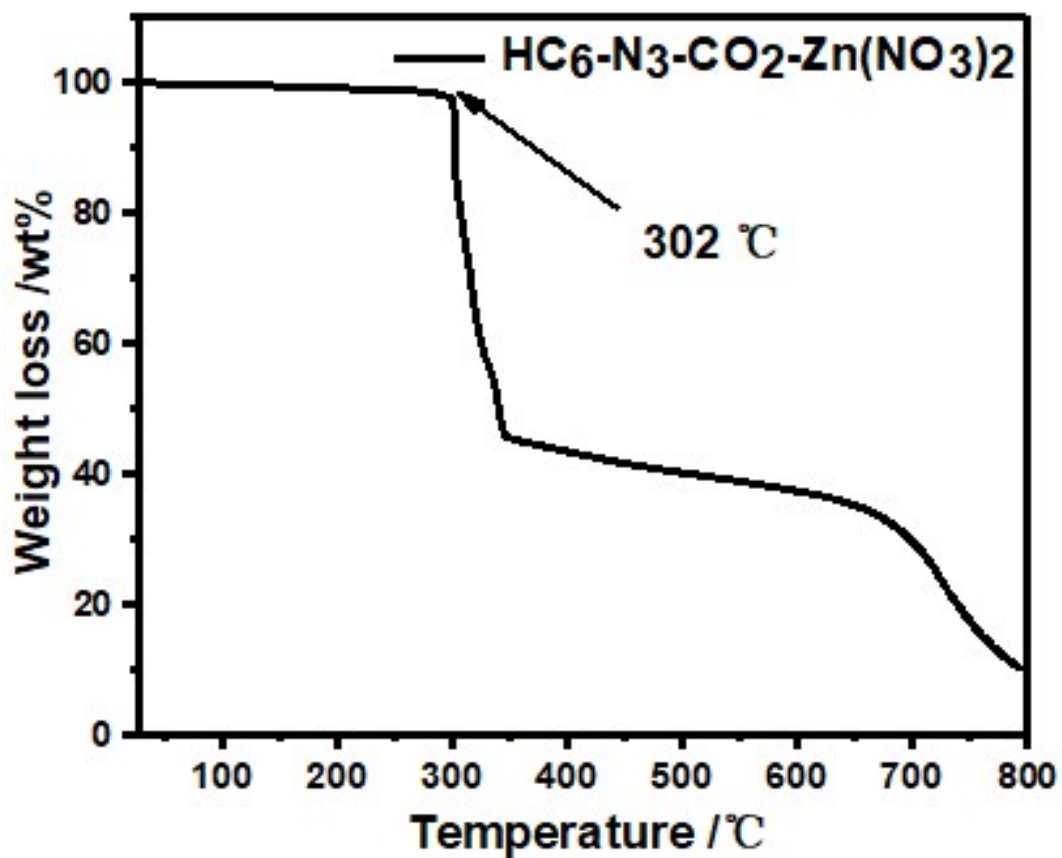

396

397

**Figure S26** TGA of  $\text{HC}_6\text{-N}_3\text{-CO}_2\text{-Zn(NO}_3)_2$  powders.

398

399

400

401

402

403

404

405

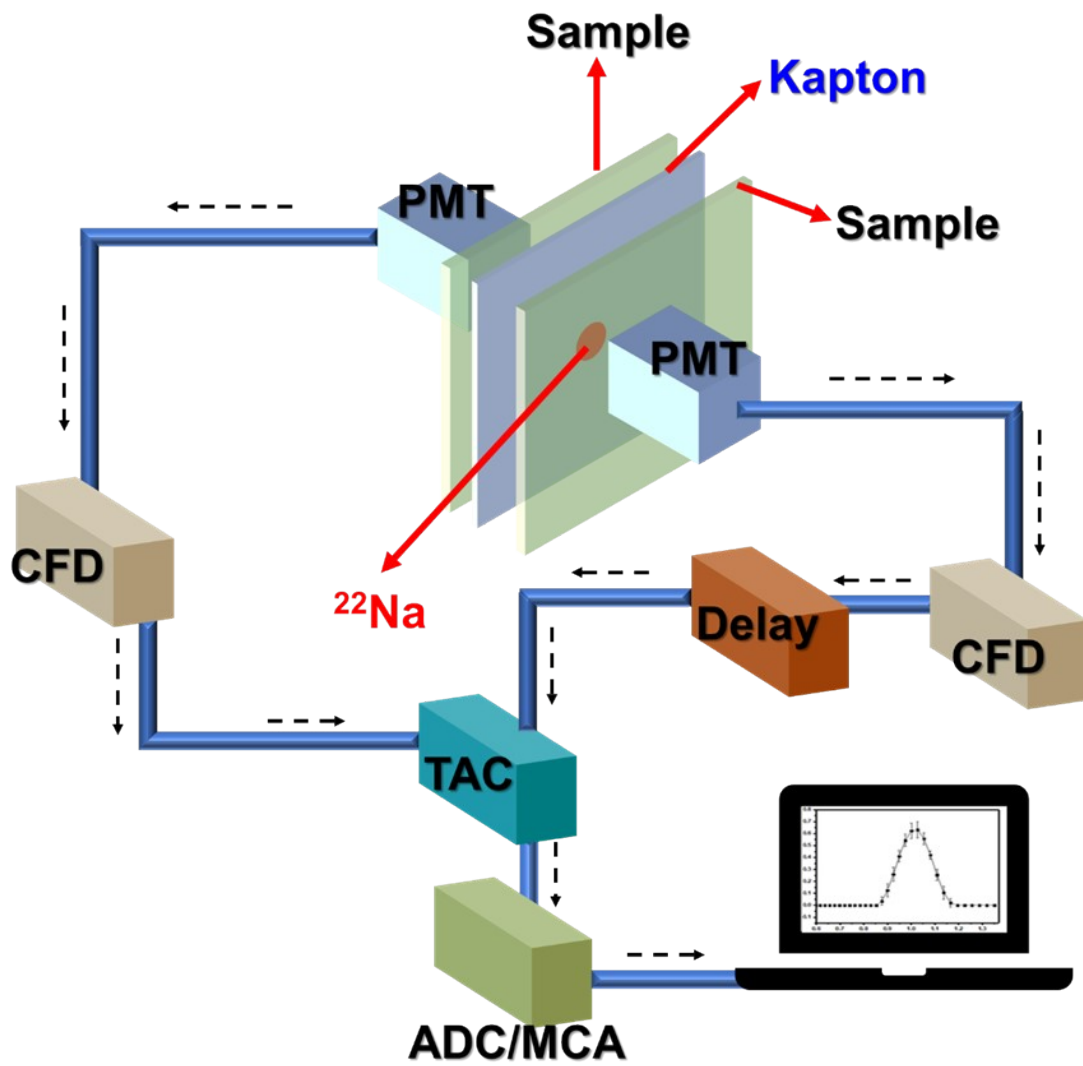

406

407

408 **Figure S27.** Schematic diagram of positron annihilation lifetime spectroscopy

409 (PALS).

410

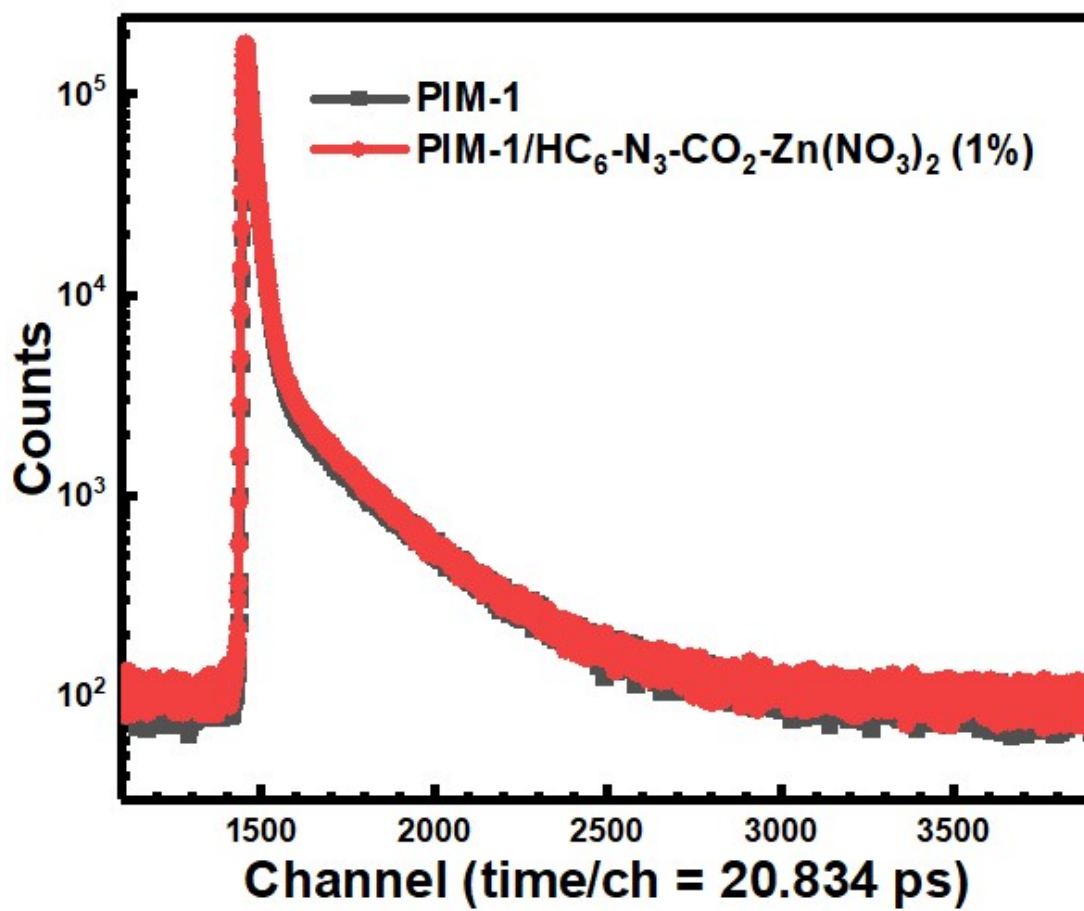

411

412 **Figure S28.** Peak-normalized positron lifetime spectra measured for the PIM-1 and

413 PIM-1/HC<sub>6</sub>-N<sub>3</sub>-CO<sub>2</sub>-Zn(NO<sub>3</sub>)<sub>2</sub> (1 %) membranes.

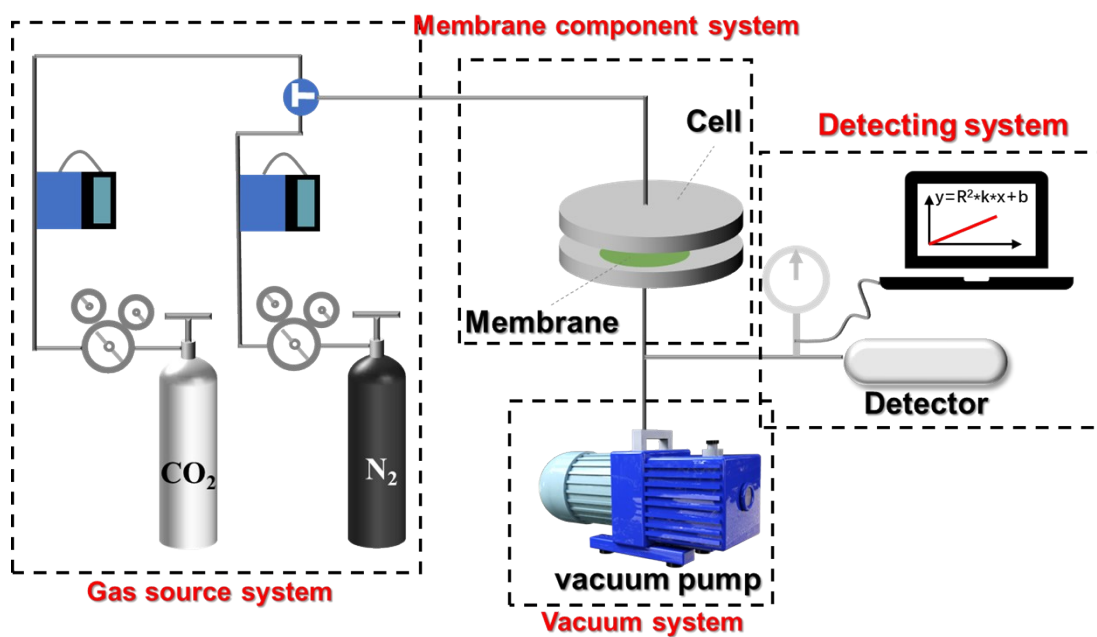

414

415 **Figure S29.** The illustration of the home-made apparatus including gas sources,

416 membrane modules, vacuum and detecting system for gas permeation tests.

417



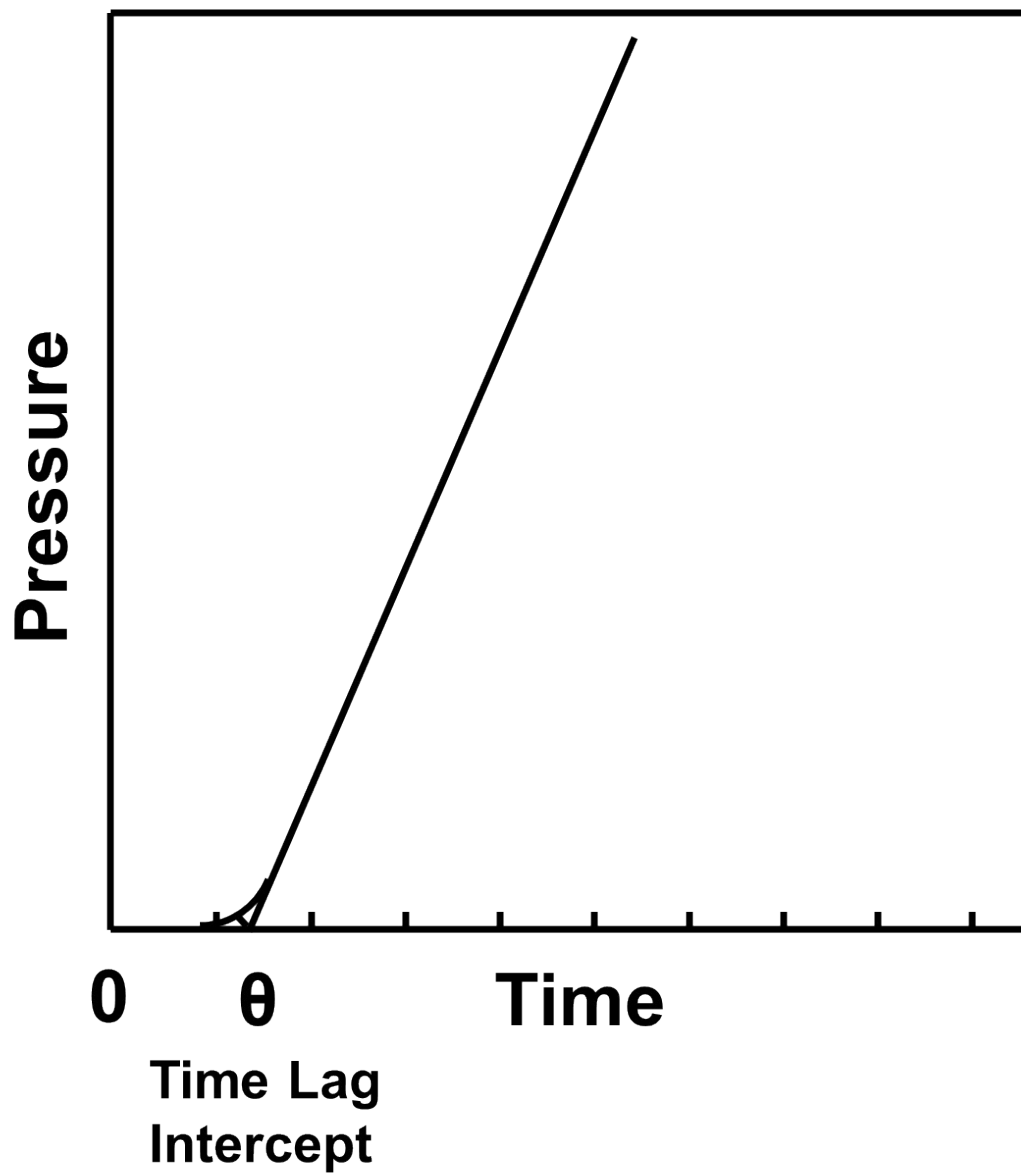

418

419 **Figure S30.** Time-lag derived from the gas permeation curve.

420

421

422

423

424

425

426

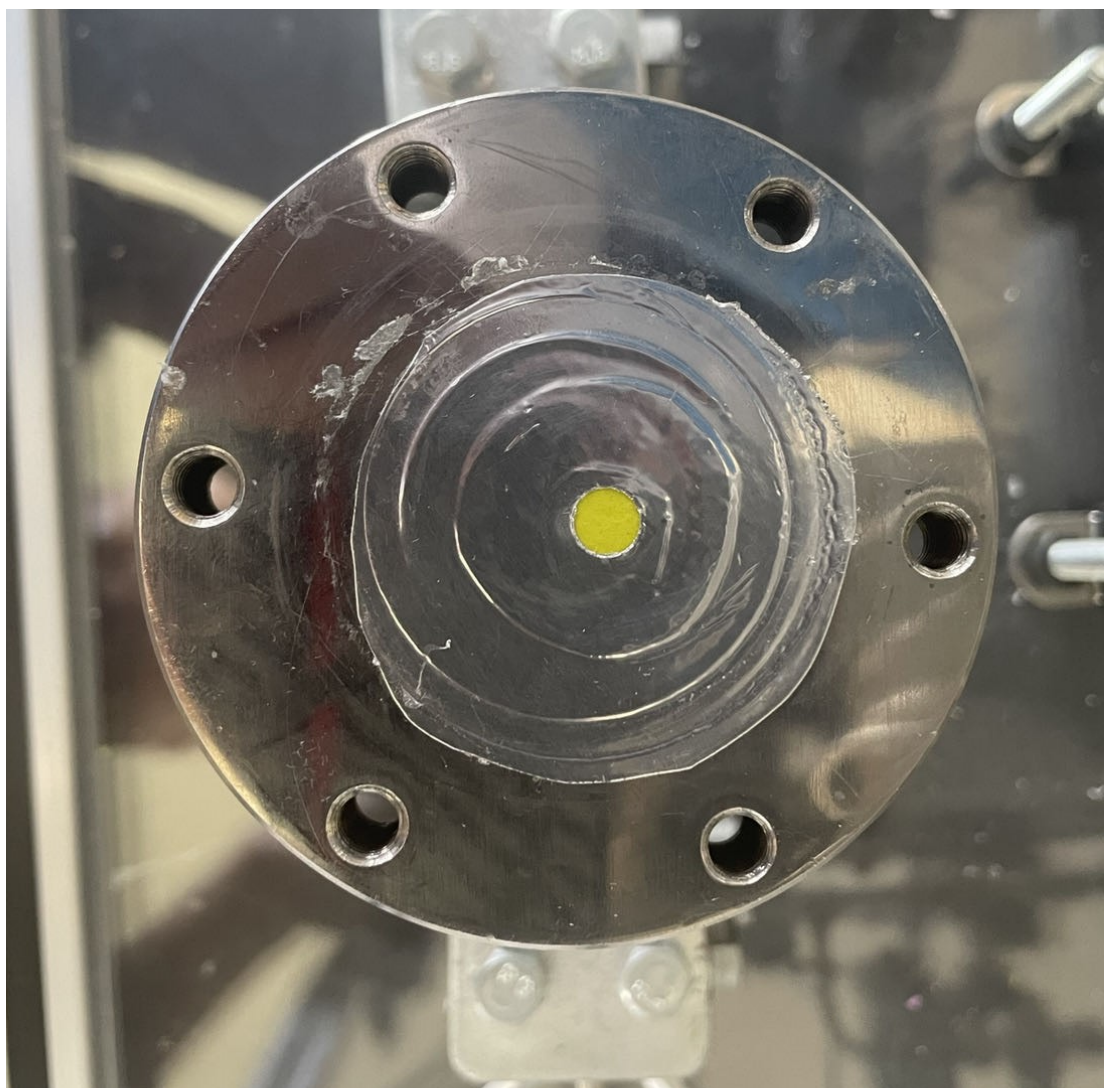

427

428

429 **Figure S31.** Digital picture of PIM-1/HC<sub>6</sub>-N<sub>3</sub>-CO<sub>2</sub>-Zn(NO<sub>3</sub>)<sub>2</sub> (1%) MMMs in the cell  
430 of the gas permeation apparatus.

431

432

433

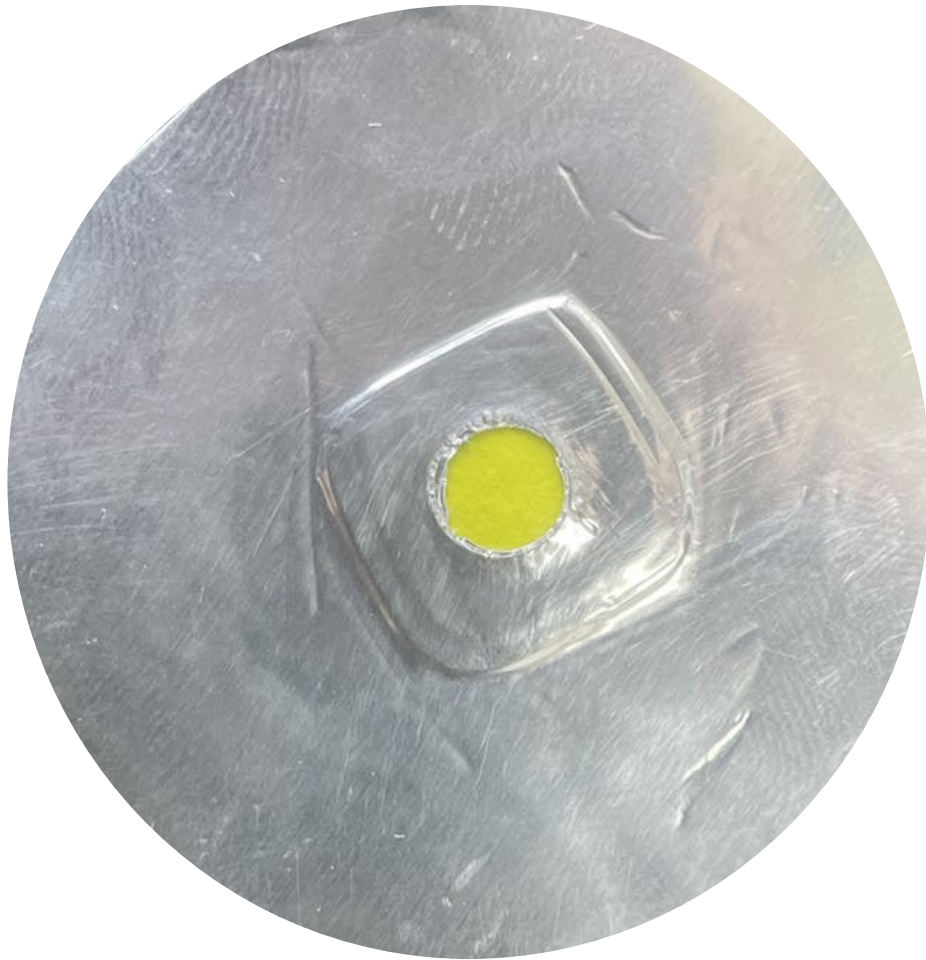

434

435 **Figure S32.** Digital picture of the PIM-1 membrane.

436

437

438

439

440

441

442

443

444 **Table S3** PALS results of the PIM-1 and PIM-1/HC<sub>6</sub>-N<sub>3</sub>-CO<sub>2</sub>-Zn(NO<sub>3</sub>)<sub>2</sub> (1 %)

445 membranes.

| Membrane                                                                                              | $\tau_1$ [ns]      | $\tau_2$ [ns]      | $\tau_3$ [ns]   | $\tau_4$ [ns]    | $I_3$ [%]       | $I_4$ [%]       | $R_3$              | $R_4$              |
|-------------------------------------------------------------------------------------------------------|--------------------|--------------------|-----------------|------------------|-----------------|-----------------|--------------------|--------------------|
| PIM-1                                                                                                 | $0.166 \pm 0.0013$ | $0.497 \pm 0.0018$ | $3.21 \pm 0.18$ | $6.55 \pm 0.12$  | $8.25 \pm 0.78$ | $17.7 \pm 0.77$ | $0.381 \pm 0.012$  | $0.552 \pm 0.0049$ |
| PIM-1/HC <sub>6</sub> -N <sub>3</sub> -<br>CO <sub>2</sub> -Zn(NO <sub>3</sub> ) <sub>2</sub><br>(1%) | $0.175 \pm 0.0007$ | $0.486 \pm 0.0013$ | $2.94 \pm 0.11$ | $6.28 \pm 0.091$ | $9.04 \pm 0.50$ | $16.5 \pm 0.52$ | $0.363 \pm 0.0077$ | $0.541 \pm 0.0039$ |

446

447

448

449

450

451

452

453

454

455

456

457

458

459

460

461

**Table S4.** Physical parameters of H<sub>2</sub>, CO<sub>2</sub>, N<sub>2</sub> and CH<sub>4</sub>.

462

| Molecule        | Kinetic diameter (Å) | Polarizability ( $10^{-25} \text{ cm}^3$ ) | Dipole moment ( $10^{-19} \text{ esu}^{-1} \text{ cm}^{-1}$ ) | Quadrupole moment ( $10^{-27} \text{ esu}^{-1} \text{ cm}^{-1}$ ) |
|-----------------|----------------------|--------------------------------------------|---------------------------------------------------------------|-------------------------------------------------------------------|
| H <sub>2</sub>  | 2.89                 | 8.04                                       | 0                                                             | 6.62                                                              |
| CO <sub>2</sub> | 3.30                 | 29.1                                       | 0                                                             | 43.0                                                              |
| N <sub>2</sub>  | 3.64                 | 17.4                                       | 0                                                             | 15.2                                                              |
| CH <sub>4</sub> | 3.76                 | 25.93                                      | 0                                                             | 0                                                                 |

463

464

465

466

467

468

469

470

471

472

473

474

475

476

477 **Table S5** Gas permeability and selectivity of PIM-1/HC<sub>6</sub>-N<sub>3</sub>-CO<sub>2</sub>-Zn(NO<sub>3</sub>)<sub>2</sub> (1

478 %) MMMs at 2 bar and 298 K

479

| Membranes                                                                                       | Permeability (Barrer) |                 |                |                 | Selectivity                     |                                  |                                |
|-------------------------------------------------------------------------------------------------|-----------------------|-----------------|----------------|-----------------|---------------------------------|----------------------------------|--------------------------------|
|                                                                                                 | H <sub>2</sub>        | CO <sub>2</sub> | N <sub>2</sub> | CH <sub>4</sub> | CO <sub>2</sub> /N <sub>2</sub> | CO <sub>2</sub> /CH <sub>4</sub> | H <sub>2</sub> /N <sub>2</sub> |
| PIM-1                                                                                           | 2566±22               | 3898±36         | 171±3          | 210±3           | 22±0.58                         | 18±0.15                          | 15±0.12                        |
| PIM-1/HC <sub>6</sub> -N <sub>3</sub> -CO <sub>2</sub> -Zn(NO <sub>3</sub> ) <sub>2</sub> (1 %) | 5066±50               | 13343±520       | 686±5          | 700±1           | 20±0.32                         | 19±0.19                          | 7±0.13                         |

480

481

482

483

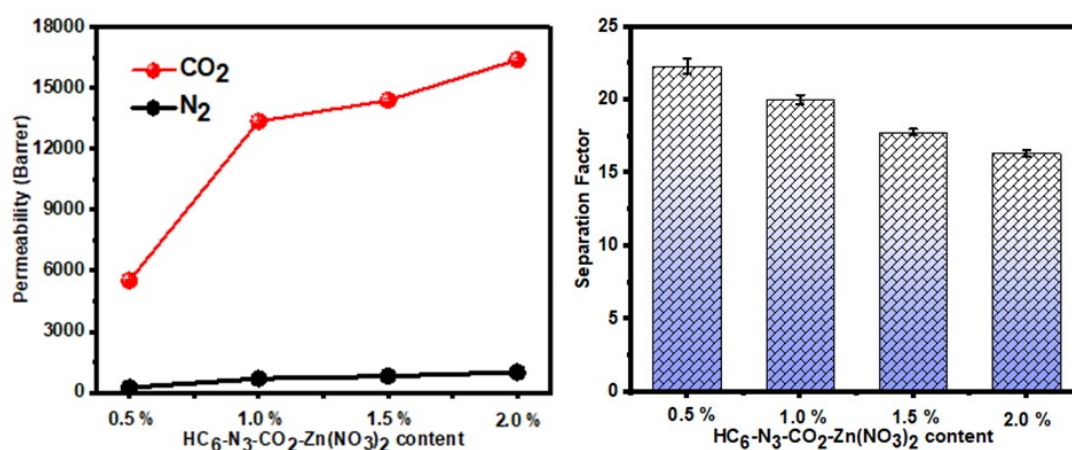

484

485 **Figure S33.** (a) CO<sub>2</sub> and N<sub>2</sub> permeability, (b) the selectivity of CO<sub>2</sub>/N<sub>2</sub> of MMMs

486 under different HC<sub>6</sub>-N<sub>3</sub>-CO<sub>2</sub>-Zn(NO<sub>3</sub>)<sub>2</sub> loading (0.5 wt%, 1.0 wt%, 1.5 wt%, 2.0 wt%).

487

488

489 **Table S6** Gas permeability and selectivity of PIM-1/HC<sub>6</sub>-N<sub>3</sub>-CO<sub>2</sub>-Zn(NO<sub>3</sub>)<sub>2</sub> (1%)

490 MMMs at 2 bar and 298 K during long-term tests.

| Time (h) | Permeability (Barrer) |                | Selectivity                     |
|----------|-----------------------|----------------|---------------------------------|
|          | CO <sub>2</sub>       | N <sub>2</sub> | CO <sub>2</sub> /N <sub>2</sub> |
| 0        | 13343±520             | 601±64         | 20.02±0.32                      |
| 12       | 10925±516             | 589±35         | 18.08±1.17                      |
| 18       | 10860±526             | 583±32         | 18.08±1.07                      |
| 24       | 10467±532             | 580±34         | 17.76±0.82                      |
| 36       | 10568±422             | 556±23         | 18.14±0.86                      |
| 48       | 10681±462             | 551±24         | 18.42±0.75                      |
| 60       | 9928±450              | 546±26         | 17.85±0.67                      |
| 66       | 9758±396              | 537±25         | 17.70±0.75                      |
| 72       | 10058±385             | 504±26         | 18.42±0.56                      |
| 96       | 9569±366              | 483±25         | 17.82±0.11                      |
| 108      | 9822±371              | 423±26         | 19.50±0.23                      |
| 120      | 9354±322              | 391±25         | 19.36±0.31                      |
| 144      | 9060±316              | 365±21         | 21.43±0.71                      |
| 168      | 8784±268              | 583±19         | 22.48±0.55                      |
| 192      | 9264±296              | 580±26         | 25.41±0.67                      |

491

492

493

494 **Table S7** Gas permeability and selectivity of PIM-1/HC<sub>6</sub>-N<sub>3</sub>-CO<sub>2</sub>-Zn(NO<sub>3</sub>)<sub>2</sub> (1 %)

495 MMMs at 298 K and different pressures

| Pressures (bars) | Permeability (Barrer) | Selectivity                     |
|------------------|-----------------------|---------------------------------|
|                  | CO <sub>2</sub>       | CO <sub>2</sub> /N <sub>2</sub> |
| 1                | 11602±537             | 20±0.83                         |
| 3                | 10229±516             | 12±0.66                         |
| 5                | 9727±427              | 16±0.52                         |
| 3                | 10475±502             | 18±0.62                         |
| 1                | 125095±565            | 21±0.71                         |
| 3                | 93425±486             | 22±0.75                         |
| 5                | 8648±362              | 18±0.41                         |
| 3                | 86428±381             | 21±0.53                         |
| 1                | 99688±392             | 21±0.58                         |

496

497

498

499

500

501

502

503

504

505

506



507 **Table S8** Comparison of CO<sub>2</sub> permeability and CO<sub>2</sub>/gases selectivity between PIM-

508 1/HC<sub>6</sub>-N<sub>3</sub>-CO<sub>2</sub>-Zn(NO<sub>3</sub>)<sub>2</sub> (1 %) MMMs in this work and other reported PIM-1/MOF

509 MMMs.

510

| Polymer                                                                                         | MOF                                                                                 | Loading (wt.%) | Measurement conditions | CO <sub>2</sub> Permeability (Barrer) | CO <sub>2</sub> /N <sub>2</sub> Selectivity | CO <sub>2</sub> /CH <sub>4</sub> Selectivity | Ref.      |
|-------------------------------------------------------------------------------------------------|-------------------------------------------------------------------------------------|----------------|------------------------|---------------------------------------|---------------------------------------------|----------------------------------------------|-----------|
| PIM-1                                                                                           | HZIF-8                                                                              | 16.7           | 3.5 bar, 308 K         | 8268                                  | 25.1                                        | 18.7                                         | [S24]     |
| PIM-1                                                                                           | ZIF-8                                                                               | 67.2           | 3.5 bar, 308 K         | 6338                                  | 24.4                                        | 18.8                                         | [S25]     |
| PIM-1                                                                                           | UiO-66-NH <sub>2</sub>                                                              | 10             | 4 bar, 298 K           | 2869                                  | 27.5                                        | 28.3                                         | [S26]     |
| PIM-1                                                                                           | UiO-66-CN                                                                           | 20             | 1.4 bar, 298 k         | 7070.9                                | 26.7                                        | -                                            | [S27]     |
| PIM-1                                                                                           | IL-UiO                                                                              | 20             | 2 bar, 298 K           | 13778                                 |                                             | 35.2                                         | [S28]     |
| Matrimid                                                                                        | UiO-66                                                                              | 11             | -                      | 22                                    | 33.5                                        | -                                            | [S29]     |
| Matrimid                                                                                        | MMIF                                                                                | 20             | 4 bar, 308 K           | 8.65                                  | 27.0                                        | 34.6                                         | [S30]     |
| Matrimid                                                                                        | Cu(BDC)                                                                             | 4              | -                      | 6.4                                   | 42                                          | -                                            | [S31]     |
| Matrimid                                                                                        | UiO-66-NH <sub>2</sub> @ICA                                                         | 10             | 3 bar, 298 K           | 41                                    | 64.2                                        | -                                            | [S32]     |
| Matrimid                                                                                        | ZiF-78                                                                              | 20             | 5 bar, 308 k           | 24                                    | 29                                          | -                                            | [S33]     |
| Matrimid                                                                                        | ZiF-95                                                                              | 30             | 3 bar, 303 k           | 23.2                                  | -                                           | 58                                           | [S34]     |
| Matrimid                                                                                        | MOF-5                                                                               | -              | 2 bar, 308 k           | 20.2                                  | 38.8                                        | -                                            | [S35]     |
| polyimide                                                                                       | ZiF-90                                                                              | 15             | 2 bar, 298 K           | 720                                   | -                                           | 37                                           | [S36]     |
| polyimide                                                                                       | PI/IPD@ZIF-8                                                                        | 45             | 3 bar, 308 K           | 4133                                  | 6.8                                         | 7.8                                          | [S37]     |
| polyimide                                                                                       | (CBMNs)                                                                             | 2              | 3 bar, 298 K           | 368                                   | -                                           | 33.6                                         | [S38]     |
| polyimide                                                                                       | GO(30)-UiO-66                                                                       | 32             | 308 k                  | 21                                    | -                                           | 51                                           | [S39]     |
| Polyimide                                                                                       | ZIF-11                                                                              | 20             | 4 bar, 303 K           | 258                                   | -                                           | 31                                           | [S40]     |
| PIM-1/HC <sub>6</sub> -N <sub>3</sub> -CO <sub>2</sub> -Zn(NO <sub>3</sub> ) <sub>2</sub> (1 %) | HC <sub>6</sub> -N <sub>3</sub> -CO <sub>2</sub> -Zn(NO <sub>3</sub> ) <sub>2</sub> | 1              | 2 bar, 298 K           | 13343                                 | 20                                          | 19                                           | This work |

|                                                                                                             |                                                                                                   |   |              |      |      |   |           |
|-------------------------------------------------------------------------------------------------------------|---------------------------------------------------------------------------------------------------|---|--------------|------|------|---|-----------|
| PIM-1/HC <sub>6</sub> -N <sub>3</sub> -CO <sub>2</sub> -Zn(NO <sub>3</sub> ) <sub>2</sub> (1 %, Aging192 h) | HC <sub>6</sub> -N <sub>3</sub> -CO <sub>2</sub> -Zn(N <sub>3</sub> O <sub>3</sub> ) <sub>2</sub> | 1 | 2 bar, 298 K | 9264 | 25.5 | - | This work |
|-------------------------------------------------------------------------------------------------------------|---------------------------------------------------------------------------------------------------|---|--------------|------|------|---|-----------|

511

512

513

514

515

516

517

518

519

520

521

522

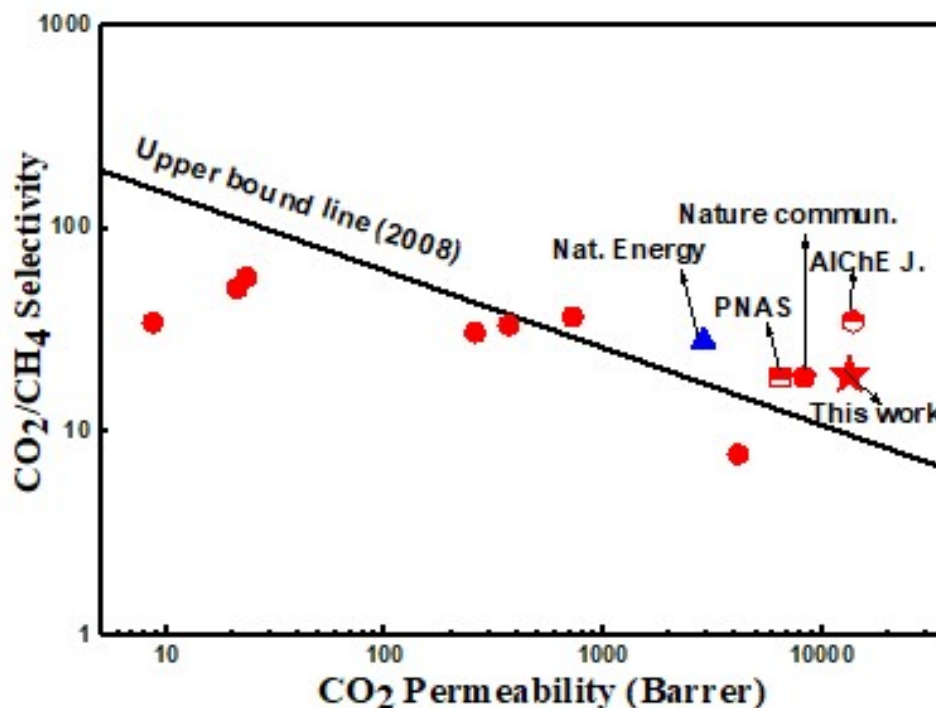

523

524 **Figure S34.** Selectivity versus permeability for CO<sub>2</sub>/CH<sub>4</sub>, where gas separation  
 525 performance of the MMMs prepared in this work (pentacles) and various MOF-based  
 526 MMMs from literatures plotted against the Robeson plot of 2008. A fully detailed  
 527 comparison of the data in this plot could be found in the Table S7.

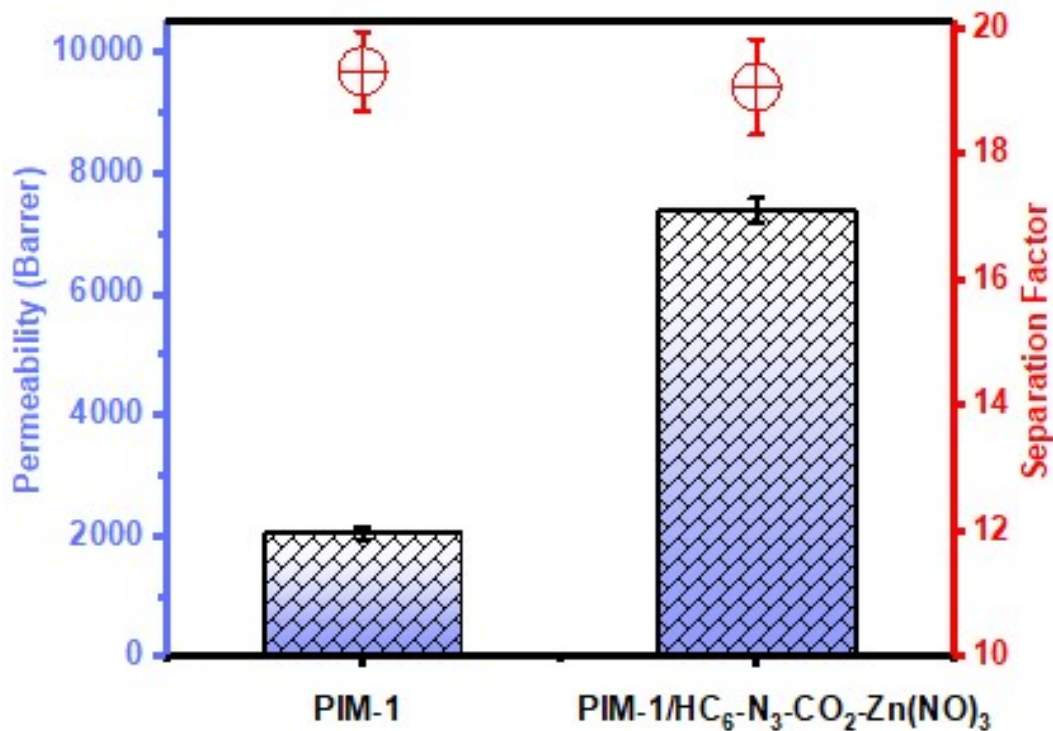

528

529 **Figure S35.** Binary CO<sub>2</sub>/N<sub>2</sub> (50/50) mixed-gas performance of PIM-1 and PIM-  
530 1/HC<sub>6</sub>-N<sub>3</sub>-CO<sub>2</sub>-Zn(NO<sub>3</sub>)<sub>2</sub> (1%) membranes.

531

532

533 **Video S1** Absorbing Exhaled CO<sub>2</sub> by HC<sub>4</sub>-N<sub>2</sub>. A phase transition process occurs  
534 rapidly.

535

536 **Video S2** Long duration (12 h) for CO<sub>2</sub> absorption with high efficiency.

537

538

539

540

541

#### 542 **Supplementary References**

543 [S1] K. Kadota *et al.*, One-pot, room-temperature conversion of CO<sub>2</sub> into porous metal-  
544 organic frameworks. *J. Am. Chem. Soc.* **143**, 16750-16757 (2021).

545 [S2] K. Kadota, N. T. Duong, Y. Nishiyama, E. Sivaniah, S. Horike, Synthesis of  
546 porous coordination polymers using carbon dioxide as a direct source. *Chem. Commun.*  
547 **55**, 9283-9286 (2019).

548 [S3] E. J. Kim, R. L. Siegelman, H. Z. H. Jiang, A. C. Forse, J. H. Lee, J. D. Martell, I,  
549 P. J. Milner, J. M. Falkowski, J. B. Neaton, J. A. Reimer, S. C. Weston, J. R. Long,  
550 *Science* **2020**, 369, 392-396.

551 [S4] K. Sumida, D. L. Rogow, J. A. Mason, T. M. McDonald, E. D. Bloch, Z. R.  
552 Herm, T. Bae, J. R. Long, *Chem. Rev.* **2012**, *11*, 724-781.

553 [S5] J. B. Lin, T. T. T. Nguyen, R. Vaidhyanathan, J. Burner, J. M. Taylor, H.  
554 Durekova, F. Akhtar, R. K. Mah, O. Ghaffari-Nik, S. Marx, N. Fylstra, S. S.  
555 Iremonger, K. W. Dawson, P. Sarkar, P. Hovington, A. Rajendran, T. K. Woo, G. K.  
556 H. Shimizu, *Science* **2021**, *374*, 1464.

557 [S6] M. Gholami, B. Verougstraete, R. Vanoudenhoven, G. V. Baron, T. V. Assche, J.  
558 F. Denayer, *Chem. Eng. J.* **2022**, *43*, 133380.

559 [S7] H. J. Choi, S. B. Hong, *Chem. Eng. J.* **2022**, *433*, 13380.

560 [S8] S. Wang, S. M. Mahurin, S. Dai, D. *ACS Appl. Mater. Interfaces* **2021**, *13*,  
561 17511-17516.

562 [S99] L. P. Silva, E. A. Crespo, M. A. R. Martins, P. C. Barbosa, R. L. Gardas, L. F.  
563 Vega, J. A. P. Coutinho, P. J. Carvalho, *Ind. Eng. Chem. Res.* **2022**, *61*, 4046-4057.

564 [S10] Y. He, X. Li, W. Cai, H. Lu, J. Ding, H. Li, H. Wan, G. Guan, *ACS Sustainable*  
565 *Chem. Eng.* **2021**, *9*, 7074-7085.

566 [S11] Y. Liu, Q. Ye, M. Shen, J. Shi, J. Chen, H. Pan, Y. Shi, *Environ. Sci. Technol.*  
567 **2011**, *45*, 5710-5716.

568 [S12] C. Zhou, S. Yu, K. Ma, B. Liang, S. Tang, C. Liu, H. Yue, *Chem. Eng. J.* **2021**,  
569 *413*, 127675.

570 [S13] M. S. Yeganeh, A. Jusufi, S. P. Deighton, M. S. Ide, M. Siskin, A. Jaishankar,  
571 C. Maldarelli, P. Bertolini, B. Natarajan, J. L. Vreeland, M. A. King, A. R. Konicek,  
572 *Sci. Adv.* **2022**, *8*, eabm0144.

573 [S14] H. Stephan, S. Linus, O. Hyunchul, H. Michael, V. L. Bettina, *Chem. Mater.*  
574 **2015** 27, 8001-8010.

575 [S15] X. Zhu, C. Tian, G. M. Veith, C. W. Abney, J. Dehaudt, S. Dai, *J. Am. Chem.*  
576 *Soc.* **2016**, 138, 11497-11500.

577 [S16] S. Kikkawa, K. Amamoto, Y. Fujiki, J. Hirayama, G. Kato, H. Miura, T.  
578 Shishido, S. Yamazoe, *ACS Environ. Au* **2022**, 2, 354.

579 [S17] S. Bureekaew, S. Shimomura, S. Kitagawa, *Sci. Technol. Adv. Mater.* **2008**, 9,  
580 1-12.

581 [S18] S. Kikkawa *et al.*, Direct air capture of CO<sub>2</sub> using a liquid amine-solid carbamic  
582 acid phase-separation system using diamines bearing an aminocyclohexyl group. *ACS*  
583 *Environ. Au* **2**, 354-362 (2022).

584 [S19] Y. Qiu *et al.*, Phase-change CO<sub>2</sub> absorption using novel 3-  
585 dimethylaminopropylamine with primary and tertiary amino groups. *Ind. Eng. Chem.*  
586 *Res.* **59**, 8902-8910 (2020).

587 [S20] X. Xu *et al.*, Next generation amino acid technology for CO<sub>2</sub> capture. *J. Mater.*  
588 *Chem. A* **9**, 1692 (2021).

589 [S21] C. María, G. D. Diego, M. N. José, Carbon dioxide chemical absorption using  
590 methyl piperidines aqueous solutions. *Fuel* **197**, 194-200 (2017).

591 [S22] M. M. Sergey, S. Matthias, Molecular dynamics study of the solution structure,  
592 clustering, and diffusion of four aqueous alkanolamines. *J. Phys. Chem. B* **122**, 2769-  
593 2778 (2018).

594 [S23] B. Liu, X. Luo, Z. W. Liang, O. Wilfred, H. Liu, The development of kinetics  
595 model for CO<sub>2</sub> absorption into tertiary amines containing carbonic anhydrase. *AIChE*  
596 *J.* **63**, 4933-4943 (2017).

597 [S24] B. Zhu *et al.*, Boosting membrane carbon capture via multifaceted polyphenol-  
598 mediated soldering. *Nat. Commun.* **14**, 1697 (2023)

599 [S25] S. He *et al.*, Symbiosis-inspired de novo synthesis of ultrahigh MOF growth  
600 mixed matrix membranes for sustainable carbon capture. *PANS* **119**, e2114964119  
601 (2022).

602 [S26] B. Ghalei *et al.*, Enhanced selectivity in mixed matrix membranes for CO<sub>2</sub>  
603 capture through efficient dispersion of amine-functionalized MOF nanoparticles. *Nat.*  
604 *energy* **2**, 17086 (2017).

605 [S27] G. Yu *et al.*, Constructing connected paths between UiO-66 and PIM-1 to  
606 improve membrane CO<sub>2</sub> separation with crystal-like gas selectivity. *Adv. Mater.* **31**,  
607 1806 (2019).

608 [S28] C. Geng, Y. Sun, Z. Zhang, Z.a Qiao, C. Zhong. Mixed matrix metal-organic  
609 framework membranes for efficient CO<sub>2</sub>/N<sub>2</sub> separation under humid conditions. *AIChE*  
610 *J.* **69**, e18025 (2023).

611 [S29] A. M. Marti, S. R. Venna, E. A. Roth, J. T. Culp, D. P. Hopkinson. Simple  
612 fabrication method for mixed matrix membranes with in situ MOF growth for gas  
613 separation. *ACS Appl. Mater. Interfaces* **10**, 24784-24790 (2018).

614 [S30] M.Ahmadi *et al.*, Highly CO<sub>2</sub> selective microporous metal-imidazolate  
615 framework based mixed matrix membranes. *ACS Appl. Mater. Interfaces* **9**, 35936-  
616 35946 (2017).

617 [S31] M. Shete *et al.*, On the direct synthesis of Cu(BDC) MOF nanosheets and their  
618 performance in mixed matrix membranes. *J. Membrane Sci.* **549**, 312-320 (2018).

619 [S32] Y. Jiang, C. Liua, J. Caro, A. Huang. A new UiO-66-NH<sub>2</sub> based mixed-matrix  
620 membranes with high CO<sub>2</sub>/CH<sub>4</sub> separation performance. *Micropor. Mesopor. Mat.* **274**,  
621 203 (2019).

622 [S33] M. van Essen, L. van den Akker, R. Thür, M. Houben, I. F. J. Vankelecom, Z.  
623 Borneman, K. Nijmeijer, *Adv. Mater. Interfaces* 2021, 8, 2001478.

624 [S34] I. Ilicak, M. S. Boroglu, A. Durmus, I. Boz, *J. Nat. Gas Sci. Eng.* 2021, 91, 103941.

625 [S35] E. V. Perez, K. J. Balkus, J. P. Ferraris, I. H. Musselman, Mixed-matrix  
626 membranes containing MOF-5 for gas separations. *J. Membrane Sci.* **328**, 165-173  
627 (2009).

628 [S36] T. H. Bae *et al.*, A High-performance gas-separation membrane containing sub  
629 micrometer-sized metal-organic framework crystals. *Angew. Chem. Int. Ed.* **49**, 9863-  
630 9866 (2010)

631 [S37] Y. Shi *et al.*, Mixed matrix membranes with highly dispersed MOF nanoparticles  
632 for improved gas separation. *Sep. Purif. Technol.* **277**,119449 (2021).

633 [S38] X. Bi, MOF Nanosheet-based mixed matrix membranes with metal-organic  
634 coordination interfacial interaction for gas separation. *ACS Appl. Mater. Interfaces* **12**,  
635 49101-49110 (2020).



636 [S39] S Castarlenas, C. Téllez, J. Coronas, Gas separation with mixed matrix  
637 membranes obtained from MOF UiO-66-graphite oxide hybrids. *J. Membrane Sci.* **526**,  
638 205-211 (2017).

639 [S40] M. S. Boroglu, A. B. Yumru. Gas separation performance of 6FDA-DAM-ZIF-  
640 11 mixed-matrix membranes for H<sub>2</sub>/CH<sub>4</sub> and CO<sub>2</sub>/CH<sub>4</sub> separation. *Sep. Purif. Technol.*  
641 **173**, 269-279 (2017).

642
